## FOR PEER REVIEW - CONFIDENTIAL

### eLife's Review Process

eLife works to improve the process of peer review so that it more effectively conveys the assessment of expert reviewers to authors, readers and other interested parties. In the future we envision a system in which research is first published as a preprint and the outputs of peer review are the primary way research is assessed, rather than journal title.

Our editorial process produces two outputs: i) an assessment by peers designed to be posted alongside a preprint for the benefit of the readers; ii) detailed feedback on the manuscript for the authors, including requests for revisions and suggestions for improvement.

Therefore we want to change how we construct and write peer reviews to make them useful to both authors and readers in a way that better reflects the work you put into reading and thinking about a paper.

eLife reviews now have three parts:

- An **evaluation summary** (in two or three sentences) that captures the major conclusions of the review in a concise manner, accessible to a wide audience.
- A **public review** that details the strengths and weaknesses of the manuscript before you, and discusses whether the authors' claims and conclusions are justified by their data.
- A set of private **recommendations for the authors** that outline how you think the science and its presentation could be strengthened.

All three sections will be used as the basis for an eLife publishing decision, which will, as always, be made after a consultation among the reviewers and editor. Each of the **public reviews** will be published (anonymously) alongside the preprint, together with a response from the authors if they choose. In the case of papers we reject after review, the authors can choose to delay posting until their paper has been published elsewhere.

If this is your first time going through this new process, we ask that you take some time to read our [Reviewer Guide](#), which discusses how we see each section will be used, what it should contain, and what we hope it accomplishes. And we remind you that, with the shift of reviews from private correspondence to public discourse, it is more important than ever that reviews are written in a **clear and constructive manner** appropriate for a public audience and mindful of the impact language choices might have on the authors.

### Information about the manuscript

#### Suppressed prefrontal neuronal firing variability and impaired social representation in IRSp53-mutant mice

Tracking no: 25-10-2021-RA-eLife-74998

**Competing interests:** Eunjoon Kim: Reviewing editor, *eLife*

#### Author contributions:

Woohyun Kim: Conceptualization; Data curation; Formal analysis; Investigation; Visualization; Writing - original draft Young Woo Noh: Investigation Seungjoon Lee: Visualization; Methodology Woochul Choi: Resources Se-Bum Paik: Resources; Funding acquisition Min Jung: Formal analysis; Funding acquisition; Writing - review and editing Eunee Lee: Conceptualization; Formal analysis; Funding acquisition; Methodology; Writing - review and editing Eunjoon Kim: Supervision; Funding acquisition; Project administration; Writing - review and editing

#### Data Availability:

Source Data files have been provided for all figures (except for Figure 1 - figure supplement 1).

N/A

#### Ethics:

Human Subjects: No Animal Subjects: Yes Ethics Statement: Mice were maintained according to the Animal Research Requirements of Korea Advanced Institute of Science and Technology (KAIST). All experiments were conducted with approval from the Committee on Animal Research at KAIST (approval number KA2020-94).

1 **Suppressed prefrontal neuronal firing variability and impaired social**  
2 **representation in IRSp53-mutant mice**

3

4 Woohyun Kim,<sup>1</sup> Young Woo Noh,<sup>1</sup> Seungjoon Lee,<sup>1</sup> Woochul Choi,<sup>2</sup> Se-Bum Paik,<sup>2</sup>  
5 Min Whan Jung,<sup>1,3,#</sup> Eunee Lee,<sup>3,4,#</sup> and Eunjoon Kim<sup>1,3,#</sup>

6

7 <sup>1</sup>Department of Biological Sciences, KAIST, Daejeon 34141, Korea; <sup>2</sup>Department of  
8 Bio and Brain Engineering, KAIST, Daejeon 34141, Korea; <sup>3</sup>Center for Synaptic Brain  
9 Dysfunctions, Institute for Basic Science (IBS), Daejeon 34141, Korea; <sup>4</sup>Department  
10 of Anatomy, College of Medicine, Yonsei University, Seoul; #Corresponding authors

11

12

13

14 \*For correspondence: [kime@kaist.ac.kr](mailto:kime@kaist.ac.kr)

15

## 16 **Abstract**

17 Social deficit is a major feature of neuropsychiatric disorders, including autism  
18 spectrum disorders, schizophrenia, and attention-deficit/hyperactivity disorder, but its  
19 neural mechanisms remain unclear. Here, we examined neuronal discharge  
20 characteristics in the medial prefrontal cortex (mPFC) of IRSp53-mutant mice, which  
21 show social deficits, during social approach. IRSp53-mutant excitatory mPFC  
22 neurons displayed an increase in baseline neuronal firing and decreases in variability  
23 and dynamic range of firing rates and burst firing during social and non-social target  
24 approaches compared to wild-type controls. As a consequence, their firing activity  
25 was less differential between social and non-social targets. In addition, there was a  
26 decrease in the proportion of excitatory mPFC neurons encoding social information  
27 but not that of those encoding non-social information. These results suggest that  
28 insufficient neuronal activity dynamics may underlie impaired cortical encoding of  
29 social information and social behaviors in IRSp53-mutant mice.

## 30 **Introduction**

31 Social dysfunction is a key feature of various neuropsychiatric disorders, including  
32 autism spectrum disorders (ASD), schizophrenia, and attention-deficit/hyperactivity  
33 disorders (ADHD). Among the various brain regions involved in social regulation, the  
34 medial prefrontal cortex (mPFC) plays critical roles in integrative and higher cognitive  
35 brain functions (Yan and Rein, 2021; Yizhar and Levy, 2021). Previous studies  
36 identified a number of mechanisms associated with dysfunctions under social  
37 context. Examples include imbalance of neuronal excitation/inhibition (Selimbeyoglu  
38 et al., 2017; Yizhar et al., 2011) (reviewed in (Lee et al., 2017; Nelson and Valakh,  
39 2015; Sohal and Rubenstein, 2019)), impaired cortical social representation (Lee et

40 al., 2021a; Lee et al., 2021b; Lee et al., 2016; Levy et al., 2019; Miura et al., 2020),  
41 and disruption of local oscillations (Cao et al., 2018b; Yizhar et al., 2011). Given that  
42 social behaviors represent outcomes of complex interactions among multiple  
43 underlying neural processes, further mechanistic explorations are needed to  
44 investigate such functions in the context of additional genes and various psychiatric  
45 disorders.

46         Insulin receptor substrate protein 53 kDa (IRSp53) encoded by the BAIAP2  
47 gene is a postsynaptic scaffolding and adaptor protein at excitatory synapses that  
48 interacts with other key components of the postsynaptic density such as PSD-95  
49 (Choi et al., 2005; Soltau et al., 2004). IRSp53 has also been implicated in ASD  
50 (Toma et al., 2011), schizophrenia (Fromer et al., 2014) and ADHD (Ribases et al.,  
51 2009). Functionally, IRSp53 regulates actin filament dynamics at excitatory synapses  
52 and dendritic spines (Kang et al., 2016; Scita et al., 2008).

53         IRSp53 deficiency in mice leads to excitatory synaptic deficits and various  
54 behavioral deficits, including hyperactivity, cognitive impairments, and social deficits  
55 (Bobsin and Kreienkamp, 2016; Chung et al., 2015; Kim et al., 2009; Kim et al.,  
56 2020; Sawallisch et al., 2009). IRSp53 knockout (KO) mice have fewer dendritic  
57 spines and enhanced NMDA receptor (NMDAR) function; they show impaired social  
58 behavior that is rescued by pharmacological NMDAR suppression (Chung et al.,  
59 2015; Kim et al., 2009). Importantly, mPFC neurons in IRSp53-KO mice show  
60 reduced neuronal firing under urethane-anesthesia, which is acutely normalized by  
61 pharmacological NMDAR suppression (Chung et al., 2015). However, it remained  
62 unknown whether and how the social behavioral deficits are associated with altered  
63 mPFC neural activity in waking-state animals engaged in social interaction.

64 To study the neural abnormalities of the mPFC associated with social  
65 dysfunction in IRSp53-KO mice, we herein performed single-unit recording in freely  
66 moving mice engaged in social interaction in a linear social-interaction chamber (Lee  
67 et al., 2016). We found that excitatory neurons in the mPFC of IRSp53-KO mice  
68 display narrower dynamic ranges of firing rate and lower discrimination between  
69 social and object targets compared to those of wild-type (WT) controls. Our results  
70 uncover a novel social coding deficit associated with IRSp53-KO.

## 71 **Results**

### 72 **Social impairments in IRSp53-KO mice in the linear-chamber social-interaction** 73 **test**

74 To compare neuronal activities in the mPFC of WT and IRSp53-KO mice during  
75 social interaction, we performed single-unit recordings in mice engaged in social  
76 interaction in a linear-chamber social-interaction apparatus (**Figure 1A**). The  
77 chamber, a long corridor connected with two side chambers with targets, was  
78 designed to measure mPFC activity during social interaction (Lee et al., 2016). A  
79 subject mouse was first placed in a separate rest box (7.5 x 15 cm) for 5 minutes for  
80 recording of resting neural activity. The mouse was then placed into the linear social-  
81 interaction chamber and allowed to explore the chamber with both side chambers  
82 being empty (empty-empty/E-E session) for 10 minutes. This was followed by a  
83 session in which one of the side chambers contained a novel social target (S; a  
84 conspecific male mouse) and the other contained a novel inanimate object (O) (first  
85 S-O session), and another session where S and O were switched (second S-O  
86 session), which was included to control for side (or location)-specific as opposed to  
87 target-specific neural activity. The positions of mice in the linear chamber during

88 experiments were determined using the DeepLabCut program (Mathis et al., 2018),  
89 which automatically marked the mouse's nose, ears, and tail base (**Figure 1B**).  
90 Sniffing time was defined as the time when the mouse's nose was within a distance  
91 of 3 cm from the front face of the target chamber. In-zone time was defined as the  
92 time when the body center (midpoint between the nose and tail base) fell in the area  
93 within 9 cm from the front face of the target chamber.

94 The single-unit activity was recorded with tetrodes from the prelimbic (PrL),  
95 infralimbic (IL), and cingulate cortex (Cg1) regions. Eight tetrodes, four tetrodes in  
96 each hemisphere, were implanted into the mPFC and lowered after each round of  
97 recording experiment to record neurons at different depths. After the last recording,  
98 the locations of all tetrodes were assessed via histology, and data from those falling  
99 within the area of interest were used for analysis (**Figure 1C, Figure 1—figure**  
100 **supplement 1A**).

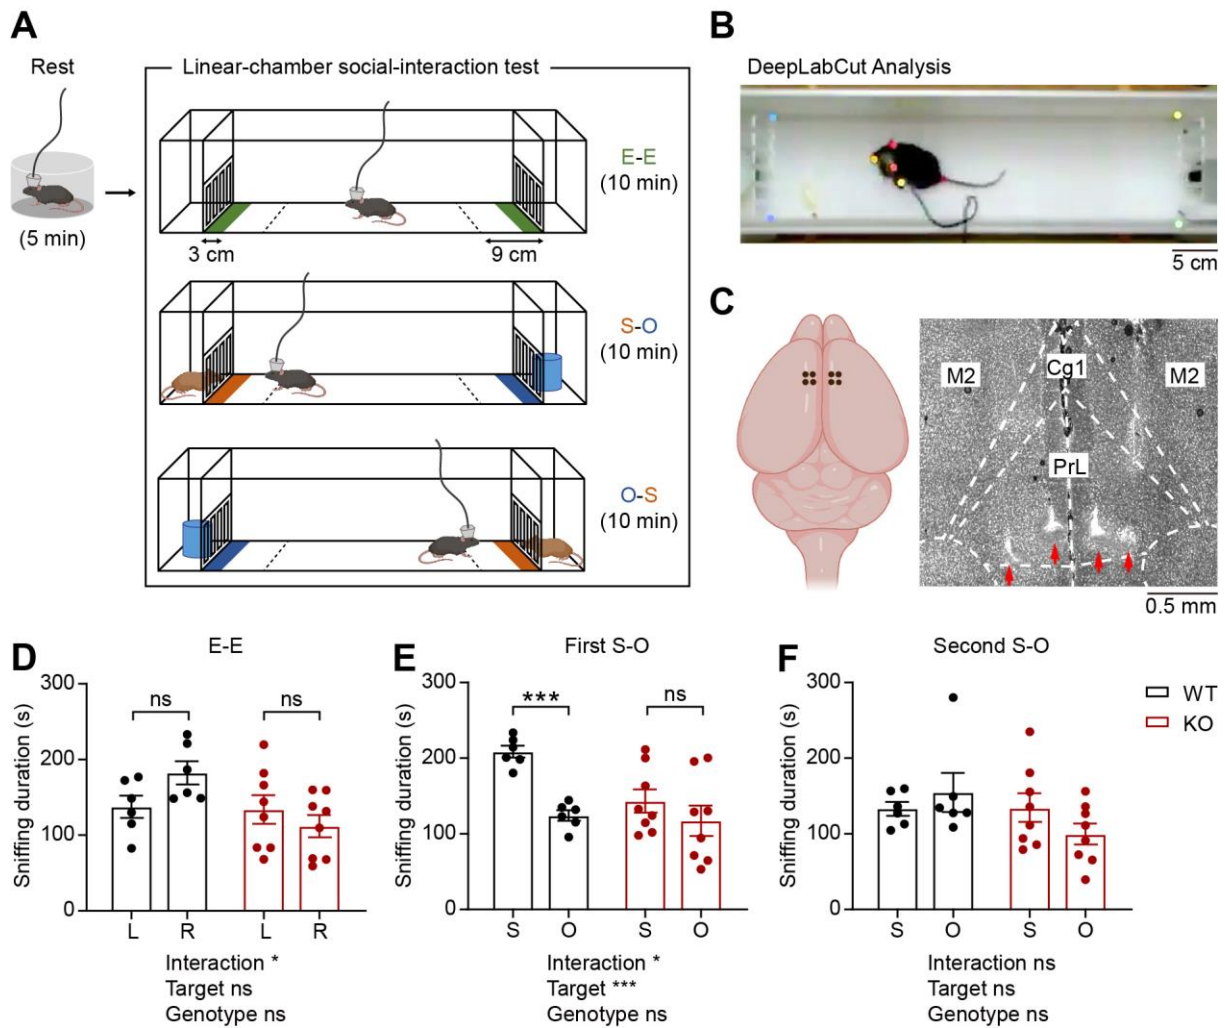

101

102 **Figure 1. Social impairments in IRSp53-KO mice in the linear-chamber social-**  
 103 **interaction test.**

104 **(A)** Schematic diagram of the linear-chamber social-interaction test used to measure  
 105 social approach towards a novel conspecific mouse (S, social) versus a novel non-  
 106 social target (O, object). A tetrode-implanted mouse was first placed in the rest box  
 107 for 5 minutes and moved to the linear social-interaction chamber to perform the  
 108 following three sessions: empty-empty (E-E) session, social-object (first S-O)  
 109 session, and object-social (second S-O) session. The in-zone areas, falling within 9  
 110 cm from the front faces of the chambers, are indicated by the dashed lines. The  
 111 sniffing zones, falling within 3 cm from the front faces of the chambers, are indicated

112 by green, orange, and blue colors.

113 **(B)** An example video frame of mouse body parts automatically tracked by the  
114 DeepLabCut program.

115 **(C)** Schematic (left) and a representative coronal brain section (right) showing the  
116 locations of the implanted tetrodes. PrL, prelimbic cortex; IL, infralimbic cortex; Cg1,  
117 cingulate cortex, area 1; M2, secondary motor cortex.

118 **(D–F)** Mean sniffing durations ( $\pm$ standard error of mean/SEM) for left (L) vs. right (R)  
119 empty targets during the E-E session **(D)** and the social (S) vs. object (O) targets  
120 during the first S-O **(E)** and second S-O **(F)** sessions. (n = 6 mice [WT], 8 mice  
121 [IRSp53-KO], \*p < 0.05, \*\*\*p < 0.001, ns, not significant, two-way repeated-  
122 measures (RM)-ANOVA with Sidak's multiple comparisons test).

123 See **Supplementary file 2** for statistics. Numerical data used to generate the figure  
124 are available in the **Figure 1—source data 1**.

125

126 **Figure 1—source data 1**

127 **Source files for mouse behavior data in Figure 1**

128 The excel file contains the numerical data used to generate Figure 1D–F.

129



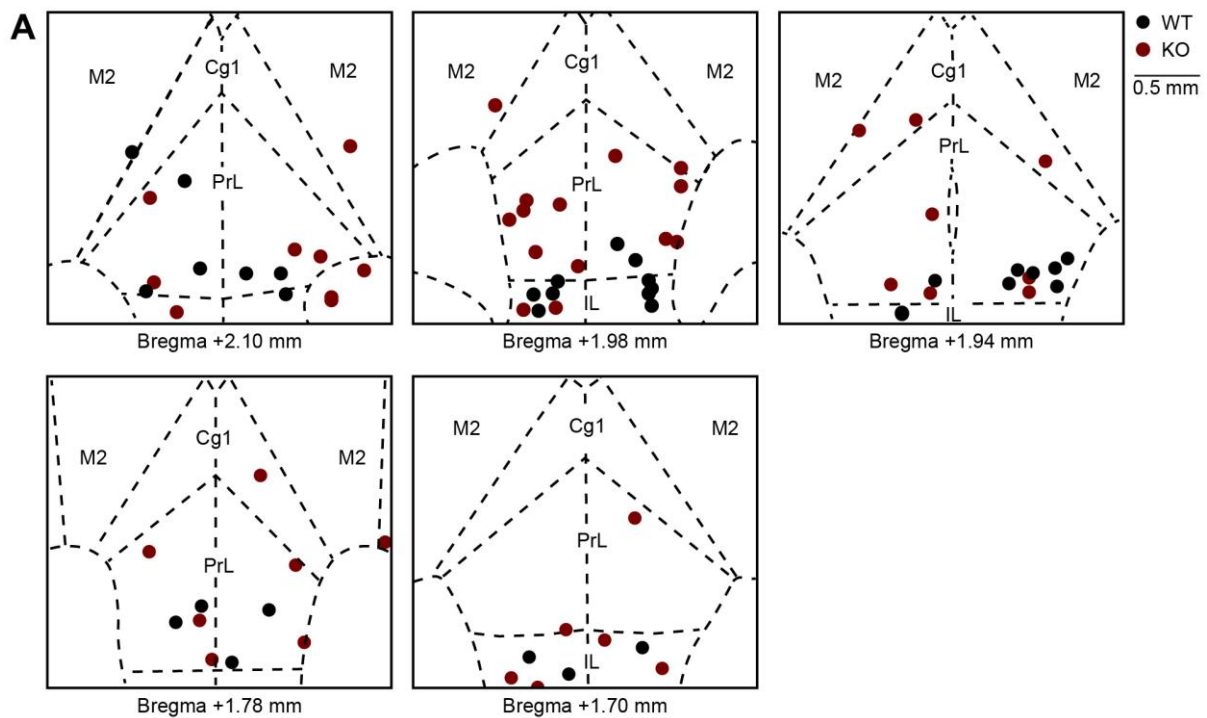

130

131 **Figure 1—figure supplement 1. Locations of implanted tetrodes in the mPFC of**

132 **WT and IRSp53-KO mice.**

133 **(A)** Final locations of tetrodes implanted into the mPFC of WT (black) and IRSp53-

134 KO (red) mice. Coronal sections of the mPFC shown in this figure represent +1.70–

135 +2.10 mm away from the bregma. PrL, prelimbic cortex; IL, infralimbic cortex; Cg1,

136 cingulate cortex, area 1; M2; secondary motor cortex.

137

138           In the E-E session, WT and IRSp53-KO mice did not show preference to the  
139 left- or right-side chamber, as assessed by sniffing and in-zone durations (**Figure**  
140 **1D, Figure 1—figure supplement 2A**). In the first S-O session, IRSp53-KO mice  
141 spent a comparable amount of time exploring the social and object targets, whereas  
142 WT mice displayed a strong preference for the social target (**Figure 1E, Figure 1—**  
143 **figure supplement 2B**). In the second S-O session, WT mice no longer displayed  
144 social preference, likely because of social habituation (**Figure 1F, Figure 1—figure**  
145 **supplement 2C**).

146           While IRSp53-KO mice showed decreased sniffing visits to the social  
147 conspecific mouse, their mean duration of each visit was comparable to that of the  
148 WT mice (**Figure 1—figure supplement 2D, E**). Moreover, there was no genotype  
149 difference in the total distance travelled (**Figure 1—figure supplement 2F, G**). WT  
150 and IRSp53-KO mice displayed a decline in the locomotor activity across successive  
151 sessions (E-E, first S-O, and second S-O) in each recording experiment (**Figure 1—**  
152 **figure supplement 2F**), but their overall locomotion remained comparable across  
153 the ten experiments (**Figure 1—figure supplement 2G**). These results collectively  
154 indicate that IRSp53-KO mice display social impairments in the linear social-  
155 interaction chamber, similar to the social impairments previously observed in three-  
156 chamber and direct/dyadic social-interaction tests (Chung et al., 2015).

157

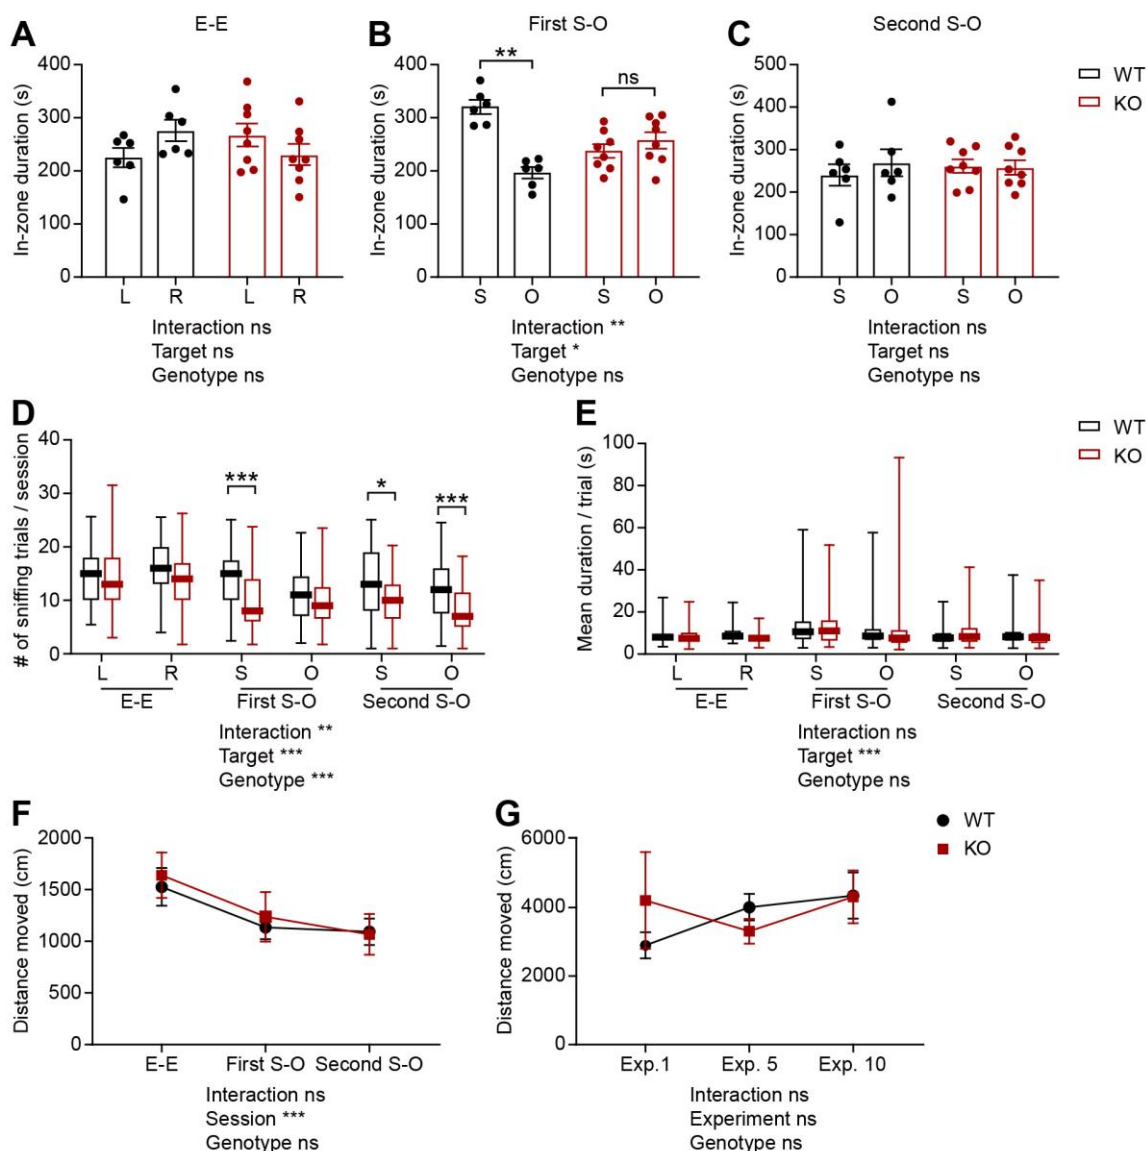

158

159 **Figure 1—figure supplement 2. Social impairments, as judged by in-zone**  
 160 **durations, and unaltered mean duration of each visit or locomotor activity in**  
 161 **IRSp53-KO mice in the linear social-interaction chamber.**

162 **(A–C)** Mean in-zone durations for left (L) vs. right (R) empty targets during the E-E  
 163 session and social (S) vs. object (O) targets during the first and second S-O  
 164 sessions. (n = 6 mice [WT], 8 mice [IRSp53-KO], \*p < 0.05, \*\*p < 0.01, ns, not  
 165 significant, two-way RM-ANOVA with Sidak's multiple comparison test).

166 **(D and E)** The average number of sniffing visits (**D**) and mean duration of time spent  
167 sniffing per valid sniffing trial (**E**) for each target during the E-E, first S-O, and second  
168 S-O sessions. (n = 57 experiments from 6 mice [WT], 69, 8 [IRSp53-KO], \*p < 0.05,  
169 \*\*p < 0.01, \*\*\*p < 0.001, ns, not significant, two-way RM-ANOVA with Sidak's  
170 multiple comparison test).

171 **(F and G)** The average ( $\pm$ SEM across 6 WT mice and 8 IRSp53-KO mice) distance  
172 moved in the linear social-interaction test across three consecutive sessions (E-E,  
173 first S-O, and second S-O) in an experiment (**F**) and across different recording  
174 experiments (1st, 5th, and 10th experiments used as examples; **G**). (n = 6 mice  
175 [WT], 8 mice [IRSp53-KO], \*\*\*p < 0.001, ns, not significant, two-way RM-ANOVA with  
176 Sidak's multiple comparison test).

177 See **Supplementary file 2** for statistics. Numerical data used to generate the figure  
178 are available in the **Figure 1—figure supplement 2—source data 1**.

179

180 **Figure 1—figure supplement 2—source data 1**

181 **Source files for mouse behavior data in Figure 1—figure supplement 2**

182 The excel file contains the numerical data used to generate Figure 1—figure  
183 supplement 2A–G.

184

## 185 **Increased resting firing rate in IRSp53-KO pExc mPFC neurons**

186 We next compared neuronal firing patterns in the mPFC of WT and IRSp53-KO mice  
187 during the abovementioned linear-chamber social-interaction test. To this end, we  
188 first analyzed rest-period firing rates in awake and freely moving WT and IRSp53-KO  
189 mice. We segregated the neurons into putative excitatory (pExc) and putative  
190 inhibitory (plnh) neurons based on their half-valley width (pExc > 200 ms; plnh < 200  
191 ms) and peak-to-valley ratio (pExc > 1.4; plnh < 1.4) (**Figure 2A, B**). The firing rate  
192 of total neurons at rest was increased in the mPFC of IRSp53-KO mice, compared  
193 with WT mice (**Figure 2C**). However, only the IRSp53-KO pExc neurons, but not  
194 IRSp53-KO plnh neurons, showed a significant increase in firing rate (**Figure 2D, E**),  
195 suggesting that pExc neurons mainly contribute to the increase in the total firing rate.  
196 These results differ from those previously obtained from anesthetized IRSp53-KO  
197 mice (Chung et al., 2015), which exhibited decreases in total and pExc firing. This  
198 highlights the importance of measuring cortical neuronal activity in behaving mice  
199 engaged in social interaction.

200 It should be noted that the majority of recorded neurons were pExc neurons  
201 (WT: 366 neurons, 93.6%, IRSp53-KO: 359 neurons, 91.1%), and that relatively few  
202 recordings were obtained from plnh neurons (WT: 17 neurons, 4.3%, IRSp53-KO: 24  
203 neurons, 8.2%). Because IRSp53 is expressed primarily in the excitatory (not  
204 inhibitory) pyramidal neurons of the cortex (Burette et al., 2014), we hypothesized  
205 that the main effects of IRSp53 loss are seen in the pExc neurons. Therefore, only  
206 pExc neurons were used for further analysis. Of all pExc neurons recorded, only  
207 those with a mean firing rate of  $\geq 0.5$  Hz were included for further analysis in order to  
208 avoid low sampling errors arising from the inclusion of neurons with low firing rates

209 **(Supplementary file 1).**

210

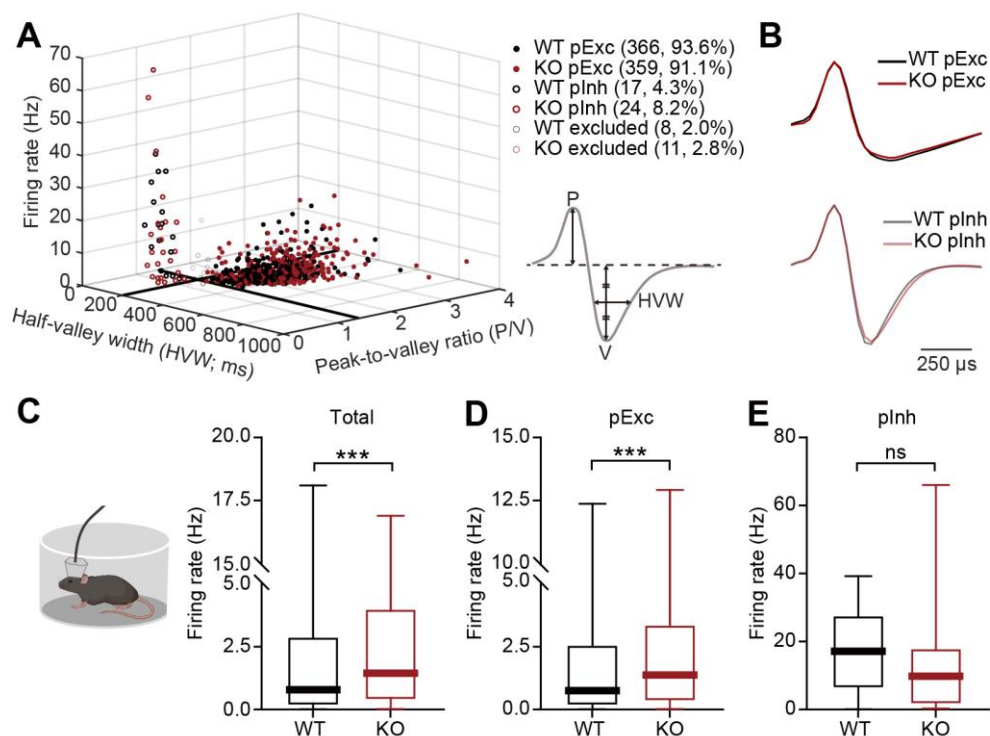

211

212 **Figure 2. Increased resting firing rate in IRSp53-KO pExc mPFC neurons.**

213 **(A)** Classification of recorded neurons into putative excitatory (pExc) and putative  
 214 inhibitory (plnh) neurons based on the half-valley width (200 ms) and peak-to-valley  
 215 ratio (1.4). P, peak; V, valley; HVW, half-valley width.

216 **(B)** Average waveforms of WT and IRSp53-KO pExc (top) and plnh (bottom)  
 217 neurons. The waveform of each neuron was normalized by its peak value.

218 **(C–E)** Firing rates of WT and IRSp53-KO total **(C)**, pExc **(D)**, and plnh **(E)** neurons in  
 219 the mPFC during the 5-min rest period. (n = 391 [WT-total], 394 [KO-total], 366 [WT-  
 220 pExc], 359 [KO-pExc], 17 [WT-plnh], 24 [KO-plnh], \*\*\*p < 0.001, ns, not significant,  
 221 Mann-Whitney test).

222 See **Supplementary file 2** for statistics. Numerical data used to generate the figure  
223 are available in the **Figure 2—source data 1**.

224

225 **Figure 2—source data 1**

226 **Source files for resting firing rate data in Figure 2**

227 The excel file contains the numerical data used to generate Figure 2A–E.

228

229 **Reduced firing-rate range and variability in IRSp53-KO pExc mPFC neurons**

230 The pExc mPFC neurons of IRSp53-KO mice showed significantly higher mean firing  
231 rates than those of WT mice during the initial 5-min rest period, but not during the  
232 30-min linear chamber test period (**Figure 3B**). Thus, pExc neurons of the mPFC did  
233 not differ significantly between IRSp53-KO and WT mice in terms of overall mean  
234 firing rates during the linear chamber test. However, we noticed in our preliminary  
235 analysis that the temporal profiles of instantaneous firing rates (3-sec time-bin  
236 advanced in 1-sec steps) differ substantially between WT and IRSp53-KO pExc  
237 neurons during the 30-min linear chamber test, as shown by the representative  
238 examples in **Figure 3A**.

239 Further examinations of instantaneous firing rate revealed that the maximum  
240 instantaneous firing rate during the linear chamber test was significantly lower in  
241 IRSp53-KO pExc neurons than WT pExc neurons. In contrast, there was a trend for  
242 higher minimum instantaneous firing rates in IRSp53-KO pExc neurons than WT  
243 pExc neurons ( $p = 0.0544$ ; **Figure 3—figure supplement 1A,B**). Consequently, the  
244 dynamic range of firing rate (the difference between the maximum and minimum

245 instantaneous firing rates) during the linear chamber test was significantly narrower  
246 for IRSp53-KO pExc neurons than WT pExc neurons (**Figure 3C**).

247 Another difference we noticed was that while WT neurons often remain silent  
248 and show abrupt increases in firing rate at specific time points, IRSp53-KO neurons  
249 tended to be active more chronically with their instantaneous firing rates fluctuating  
250 around the mean (**Figure 3A**). To test whether this is indeed the case, we examined  
251 the distribution of instantaneous firing rates of WT and IRSp53-KO neurons  
252 (normalized to the maximum firing rate). As expected, IRSp53-KO neurons had a  
253 significantly lower proportion of time-bins in the lowest firing rate (0–0.1) and instead  
254 higher proportions in mid-range firing rates (0.2–0.6) compared to the WT neurons  
255 (**Figure 3D**).

256 Given the reduced firing-rate range, we speculated that the firing rate  
257 variability of IRSp53-KO pExc neurons may also be decreased. We defined the firing  
258 rate variability of each neuron by the sigma value (1 standard deviation around the  
259 mean) of its instantaneous firing rates. We found that the instantaneous firing rates  
260 of IRSp53-KO neurons were indeed less variable, as indicated by a decrease in the  
261 sigma value (**Figure 3E**). This decrease in sigma value was observed consistently  
262 across the analyses using variable sizes of time window for calculating  
263 instantaneous firing rate, ranging from 0.5 to 5 s (**Figure 3—figure supplement 1C**).  
264 This phenomenon was specific to the recordings from the linear chamber sessions  
265 but not the rest period (**Figure 3—figure supplement 1D**). In order to test if this  
266 decrease in the variability in the IRSp53-KO neurons is dependent upon the mean  
267 firing rate, the relationship between mean firing rates and sigma values was  
268 compared between genotypes (**Figure 3F**). As indicated by the significant decrease



269 in the intercept—and comparable slope— of the linear regression, IRSp53-KO  
270 neurons were generally less variable in instantaneous firing activity regardless of  
271 their mean discharge rate.

272 We next examined whether firing rate variability varies across the three  
273 sessions (E-E, first S-O, and second S-O) of the linear chamber test. We found that  
274 WT neurons showed increased variability in instantaneous firing rate during the first  
275 S-O session compared to the E-E session. In contrast, IRSp53-KO neurons showed  
276 similar levels of variability across the three sessions (**Figure 3G**). The increase in the  
277 variability of IRSp53-KO neuronal activity during the first S-O session could not be  
278 accounted for by the difference in mean firing rate (**Figure 3—figure supplement**  
279 **1E**). These results collectively indicate that excitatory mPFC neurons in IRSp53-KO  
280 mice have reduced firing-rate range and variability.

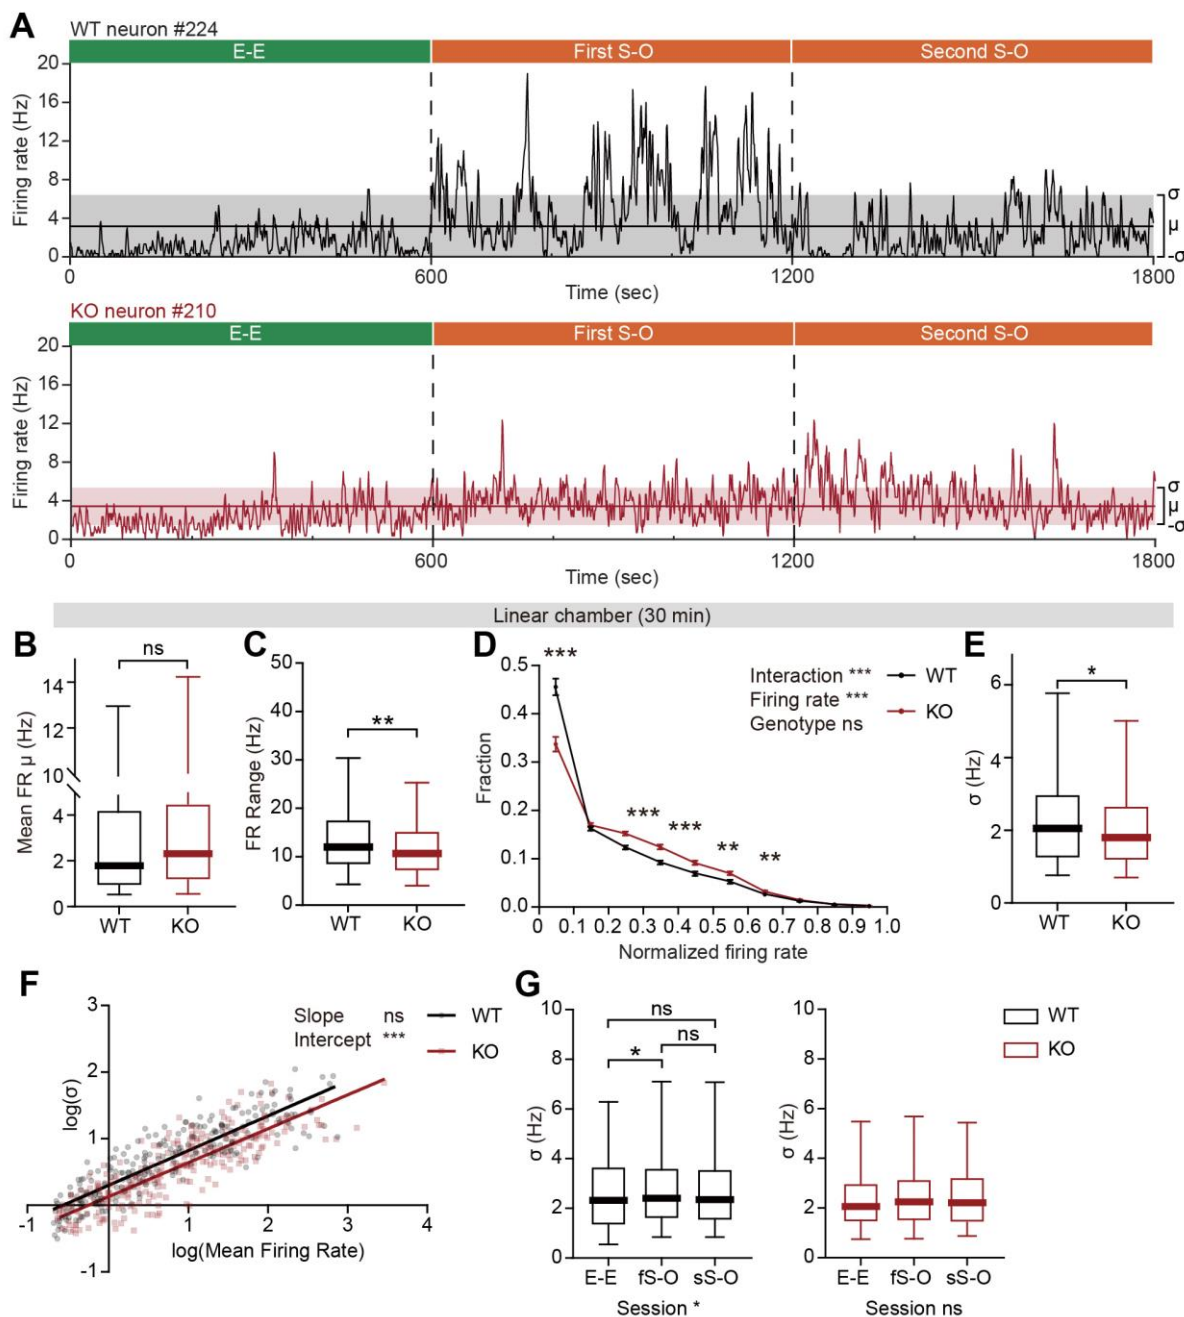

281

282 **Figure 3. Decreased firing-rate range and variability in IRSp53-KO pExc mPFC**  
283 **neurons during linear chamber exploration.**

284 **(A)** Instantaneous firing-rate traces of representative WT (top) and IRSp53-KO  
285 (bottom) pExc neurons (3-sec window advanced in 1-sec steps) during a sample  
286 linear chamber experiment (30 min). Solid horizontal lines indicate mean firing rates

287 ( $\mu$ ). Shaded regions indicate one standard deviation ( $\sigma$ , sigma).

288 **(B)** Mean firing rates of WT and IRSp53-KO pExc neurons during the 30-min linear  
289 chamber test. (n = 233 [WT-pExc] and 258 [KO-pExc], ns, not significant, Mann-  
290 Whitney test).

291 **(C)** Firing-rate ranges (maximum – minimum instantaneous firing rate) of WT and  
292 IRSp53-KO pExc neurons during the linear chamber test (n = 233 [WT-pExc] and  
293 258 [KO-pExc], \*\*p < 0.01, Mann-Whitney test).

294 **(D)** Mean ( $\pm$ SEM) histograms of normalized instantaneous firing rate during the  
295 linear chamber test. For each neuron, instantaneous firing rates were normalized by  
296 its maximum instantaneous firing rates. (n = 233 [WT-pExc] and 258 [KO-pExc], \*\*p  
297 < 0.01, \*\*\*p < 0.001, ns, not significant, two-way RM-ANOVA with Bonferroni's  
298 multiple comparisons test).

299 **(E)** Sigma values of the instantaneous firing rates of WT and IRSp53-KO pExc  
300 neurons during the linear chamber test. (n = 233 [WT-pExc] and 258 [KO-pExc], \*p <  
301 0.05, Mann-Whitney test).

302 **(F)** Log-scale scatter plot of sigma values against mean firing rates of WT and  
303 IRSp53-KO pExc neurons during the linear chamber test. Solid lines indicate simple  
304 linear regression of WT (black) and KO (red) values. (n = 233 [WT-pExc] and 258  
305 [KO-pExc], \*\*\*p < 0.001, ns, not significant, slope comparison test (see Methods)).

306 **(G)** Sigma values for the instantaneous firing rates of WT (left) and IRSp53-KO  
307 (right) pExc neurons during the E-E, first S-O, and second S-O sessions of the linear  
308 chamber test. (n = 233 [WT-pExc] and 258 [KO-pExc], \*p < 0.05, ns, not significant,  
309 Friedman test followed by Dunn's multiple comparisons test).

310 See **Supplementary file 2** for statistics. Numerical data used to generate the figure  
 311 are available in the **Figure 3—source data 1**.

312

313 **Figure 3—source data 1**

314 **Source files for instantaneous firing rate data in Figure 3**

315 The excel file contains the numerical data used to generate Figure 3A–G.

316

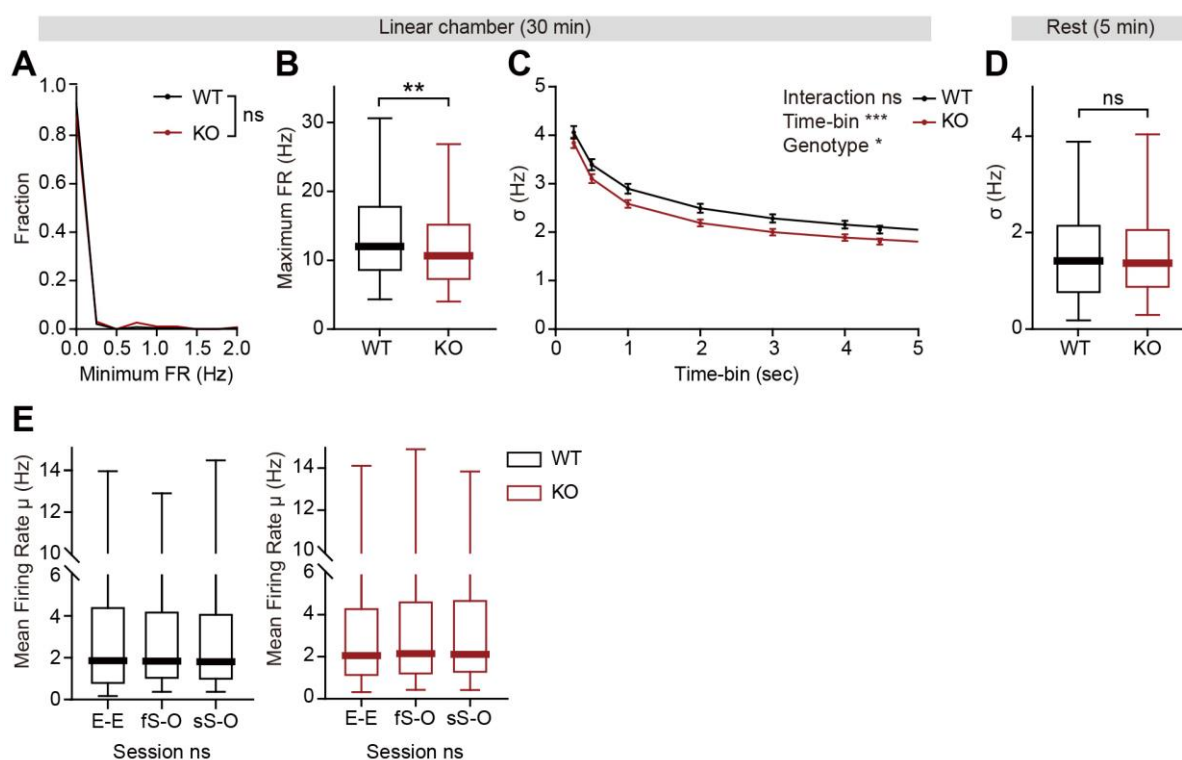

317

318 **Figure 3—figure supplement 1. Decreased firing-rate variability in IRSp53-KO**  
 319 **pExc mPFC neurons selectively during linear chamber exploration.**

320 **(A and B)** Minimum **(A)** and maximum **(B)** instantaneous firing rates of WT and

321 IRSp53-KO pExc neurons during the 30-min linear chamber test. (n = 233 [WT-pExc]

322 and 258 [KO-pExc], \*\*p < 0.01, Mann-Whitney test).

323 **(C)** Average ( $\pm$ SEM) sigma values of instantaneous firing rates during the 30-min  
324 linear chamber test calculated using different time-bin sizes (0.25–5 sec). Window  
325 sizes were set to be the same as the time-bin size. Note that the overall sigma  
326 values of IRSp53-KO neurons are significantly smaller than those of the WT neurons  
327 for all analyzed time-bin sizes. (n = 233 [WT-pExc] and 258 [KO-pExc], \*p < 0.05,  
328 \*\*\*p < 0.001, ns, not significant, two-way RM-ANOVA).

329 **(D)** Sigma values for the instantaneous firing rates (3-sec window advanced in 1-sec  
330 steps) during the 5-min rest period in WT and IRSp53-KO pExc neurons. (n = 233  
331 [WT-pExc] and 258 [KO-pExc], ns, not significant, Mann-Whitney test).

332 **(E)** Mean instantaneous firing rates of WT (left) and IRSp53-KO (right) pExc neurons  
333 during the E-E, first S-O, and second S-O sessions of the linear chamber test. (n =  
334 233 [WT-pExc] and 258 [KO-pExc], ns, not significant, Friedman test).

335 See **Supplementary file 2** for statistics. Numerical data used to generate the figure  
336 are available in the **Figure 3—figure supplement 1—source data 1**.

337

338 **Figure 3—figure supplement 1—source data 1**

339 **Source files for instantaneous firing rate data in Figure 3—figure supplement 1**

340 The excel file contains the numerical data used to generate Figure 3—figure  
341 supplement 1A–E.

342

### 343 **Impaired bursting in IRSp53-KO pExc mPFC neurons**

344 Based on the reduction in the firing-rate range, we reasoned that there may be a  
345 shift in the distribution of interspike intervals (ISIs) in IRSp53-KO pExc neurons.  
346 Contrary to the comparable levels of average ISI histograms between WT and  
347 IRSp53-KO pExc neurons at rest, those during the linear chamber test differed in  
348 IRSp53-KO pExc neurons. In particular, there was a pronounced reduction in the  
349 proportion of ISIs  $\leq 10$  ms (**Figure 4A, B**). This result suggests that the ability to  
350 exhibit an abrupt increase in firing rate may be impaired in IRSp53-KO pExc  
351 neurons.

352 Because there was a shift in the ISI distribution of IRSp53-KO pExc neurons,  
353 we reasoned that burst firing might be reduced in IRSp53-KO mice. We defined burst  
354 spikes as those with short ISIs ( $\leq 10$  ms) during linear chamber exploration (**Figure**  
355 **4B**). Comparing burst firing across the rest and linear chamber periods, we found  
356 that burst firing (ISI  $\leq 10$  ms) increased significantly when WT mice switched from  
357 the resting state to linear chamber-exploring state. Such change, however, was not  
358 observed in IRSp53-KO mice (**Figure 4C**). Burst firing did not differ significantly  
359 between WT and IRSp53-KO pExc neurons during the rest period, but was  
360 significantly lower in IRSp53-KO pExc neurons than WT pExc neurons during the  
361 linear chamber sessions (**Figure 4C**). The same conclusion was obtained when we  
362 increased the cut-off value for burst spikes up to 30 ms (**Figure 4D, E**).

363 The majority of burst events for pExc neurons (~70–90%) were spike  
364 doublets (two-spike events) in both WT and IRSp53-KO mice. However, the  
365 proportions of burst events with three spikes (spike triplets) or  $\geq 4$  spikes were  
366 significantly lower in IRSp53-KO neurons than WT neurons (**Figure 4—figure**

367 **supplement 1A**). In addition, the composition of burst events (according to spike  
368 count) varied between social and object targets in WT, but not IRSp53-KO, pExc  
369 neurons (**Figure 4—figure supplement 1B, C**). WT burst events during social target  
370 sniffing consisted of significantly higher proportions of triplet and  $\geq 4$  spikes burst  
371 events, compared to those during object target sniffing, in the analysis using  
372 moderate cut-off values for burst spikes (15–30 ms) (**Figure 4—figure supplement**  
373 **1B, C**).

374 The coefficient of variation (CV) of ISIs is a well-known measure of single  
375 neuronal spike variability (Sendhilnathan et al., 2020). Confirming the results  
376 obtained from the analysis using sigma values, we found that the CV of ISIs was  
377 significantly lower for IRSp53-KO pExc neurons compared to WT pExc neurons.  
378 Moreover, CV of ISIs increased during linear chamber exploration relative to the rest  
379 period in both genotypes (**Figure 4F**). Consistent with the results obtained from the  
380 analysis of sigma value, WT neurons, but not IRSp53-KO neurons, showed a  
381 significant increase in spike variability during the first S-O session compared to E-E  
382 session (**Figure 4G**). Interestingly, ISI CVs were generally higher in both WT and  
383 IRSp53-KO pExc neurons during social target sniffing compared to object target  
384 sniffing; however, the overall ISI CVs were lower in IRSp53-KO pExc neurons  
385 (**Figure 4H**).

386 Taken together, these results suggest that IRSp53-KO pExc neurons show  
387 diminished burst firing and a weakened ability to discriminate social and object  
388 targets by distinct burst event compositions.

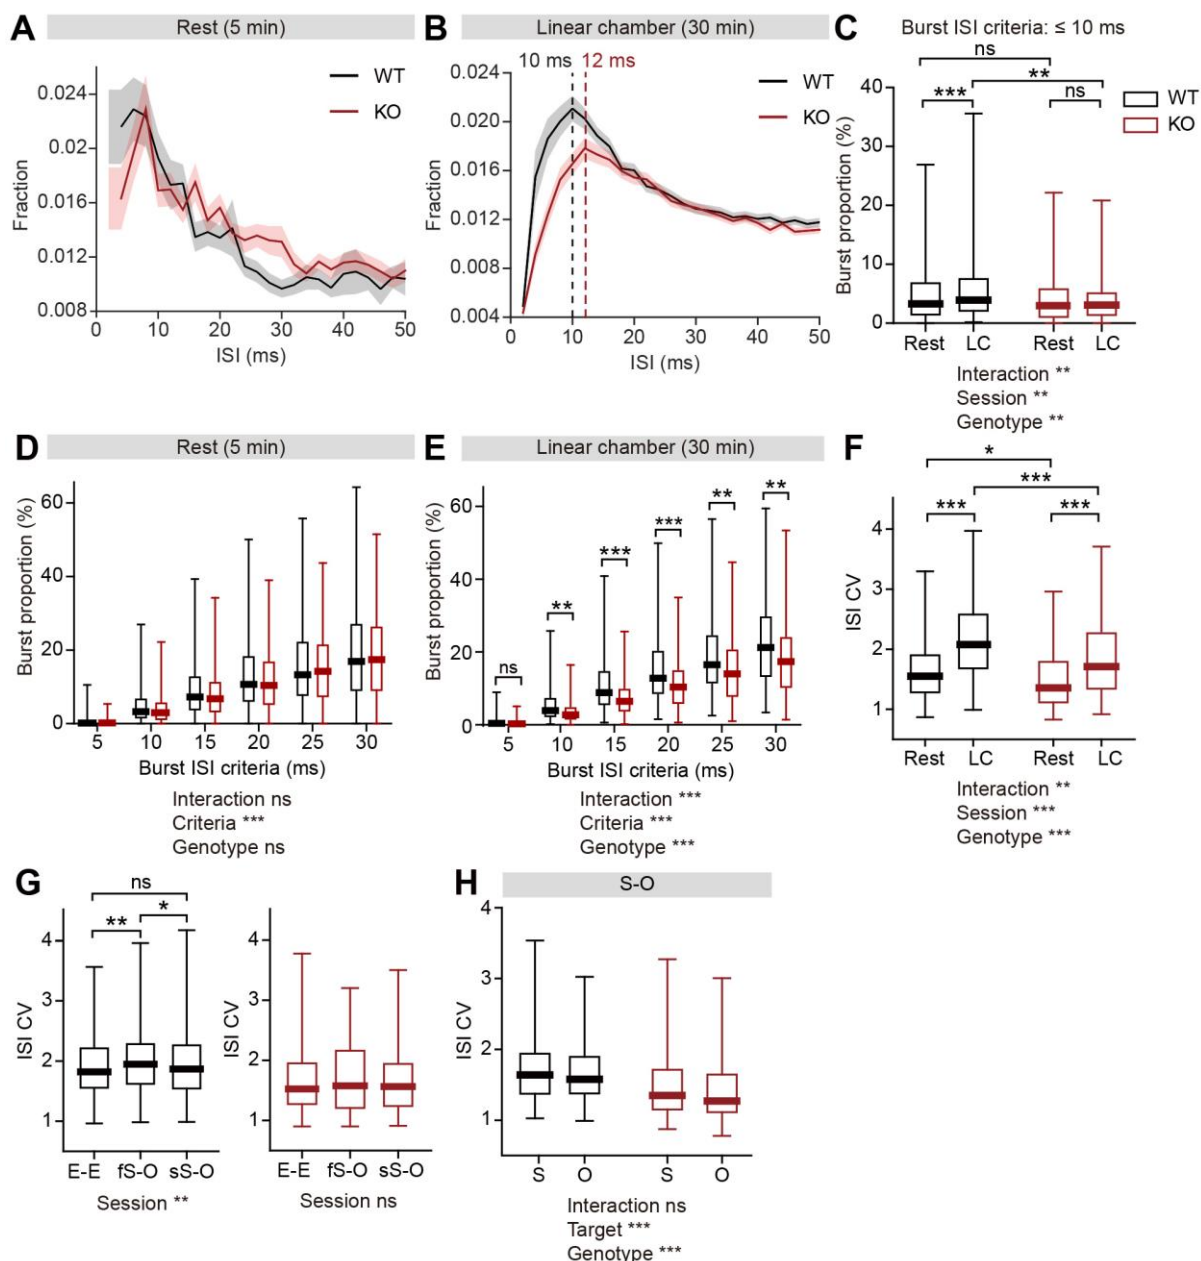

389

390 **Figure 4. Lower burst firing and spike variability in IRSp53-KO pExc mPFC**  
 391 **neurons during linear chamber exploration.**

392 **(A and B)** Mean (±SEM) histograms of interspike intervals (ISI) at the 5-min rest **(A)**  
 393 and the 30-min linear chamber **(B)** periods. Note that the peaks of mean ISI  
 394 distributions for WT (black) and IRSp53-KO (red) neurons fall at 10 ms and  
 395 respectively (indicated by dashed lines). (n = 233 [WT-pExc] and 258 [KO-pExc]).



396 **(C)** Burst proportions (proportion of burst spikes out of total spikes) of WT and  
397 IRSp53-KO pExc neurons during the rest and linear chamber (LC) periods for burst  
398 ISI threshold of 10 ms. (n = 233 [WT-pExc] and 258 [KO-pExc], \*\*p < 0.01, \*\*\*p <  
399 0.001, ns, not significant, two-way RM-ANOVA with Sidak's multiple comparisons  
400 test).

401 **(D and E)** Burst proportions of WT and IRSp53-KO pExc neurons during the rest (**D**)  
402 and linear chamber (**E**) periods, for different burst ISI thresholds. (n = 233 [WT-pExc]  
403 and 258 [KO-pExc], \*p < 0.05, \*\*p < 0.01, \*\*\*p < 0.001, ns, not significant, two-way  
404 RM-ANOVA with Sidak's multiple comparisons test).

405 **(F)** Coefficient of variations (CVs) of ISIs for WT and IRSp53-KO pExc neurons  
406 during the rest and linear chamber periods. (n = 233 [WT-pExc] and 258 [KO-pExc],  
407 \*p < 0.05, \*\*p < 0.01, \*\*\*p < 0.001, two-way RM-ANOVA with Sidak's multiple  
408 comparisons test).

409 **(G)** ISI CVs for WT (left) and IRSp53-KO (right) pExc neurons during the E-E, first S-  
410 O, and second S-O sessions of the linear chamber test. (n = 233 [WT-pExc] and 258  
411 [KO-pExc], \*p < 0.05, \*\*p < 0.01, ns, not significant, Friedman test with Dunn's  
412 multiple comparisons test).

413 **(H)** ISI CVs for WT and IRSp53-KO pExc neurons during social (S) versus object (O)  
414 sniffing in the first and second S-O sessions combined. (n = 233 [WT-pExc] and 258  
415 [KO-pExc], \*\*\*p < 0.001, ns, not significant, two-way RM-ANOVA with Sidak's  
416 multiple comparisons test).

417 See **Supplementary file 2** for statistics. Numerical data used to generate the figure  
418 are available in the **Figure 4—source data 1**.

419

420 **Figure 4—source data 1**

421 **Source files for ISI and burst data in Figure 4**

422 The excel file contains the numerical data used to generate Figure 4A–H.

423

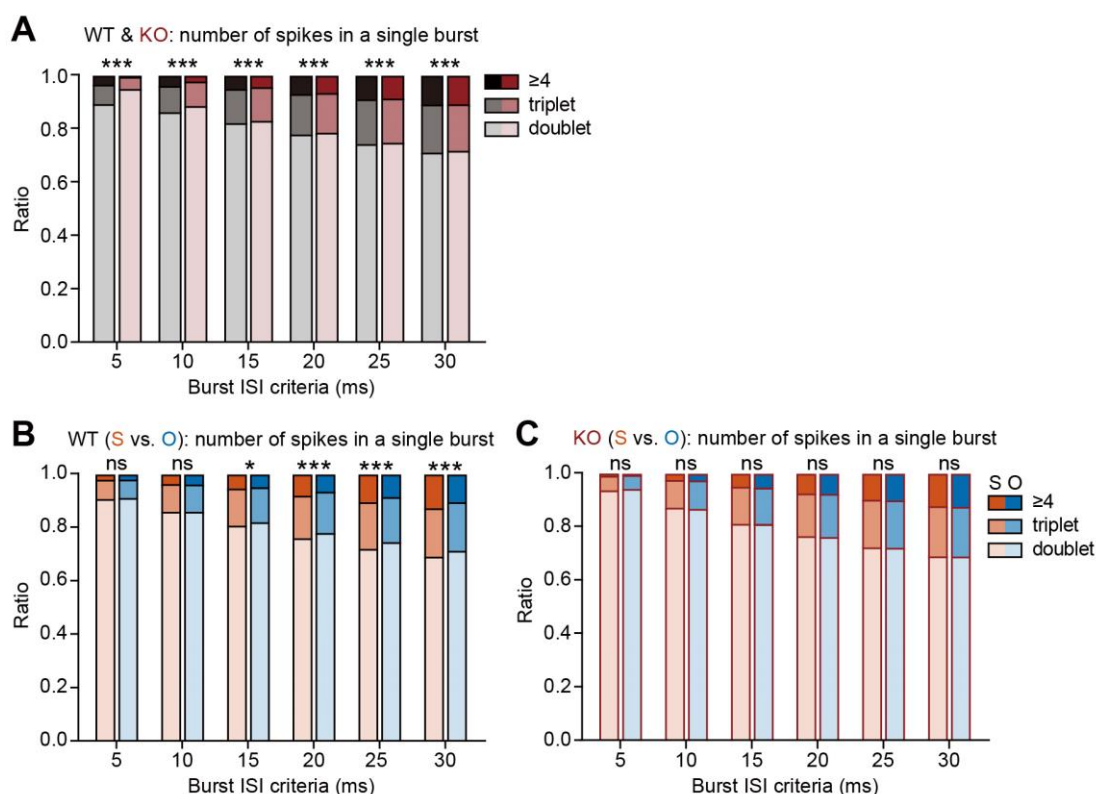

424

425 **Figure 4—figure supplement 1. Lower discriminability between social and**  
 426 **object targets by compositions of burst events in IRSp53-KO pExc mPFC**  
 427 **neurons.**

428 **(A)** Numbers of spikes in each burst (doublet, triplet, and ≥4) for different burst ISI  
 429 thresholds. All burst events from entire recordings of 233 WT pExc neurons and 258  
 430 IRSp53-KO pExc neurons were used for analysis. Note that as the burst ISI  
 431 threshold increases, the proportion of bursts with three or more consecutive spikes

432 (triplet and  $\geq 4$  groups) increases. Note also that most of the bursts (~70 – 90%) are  
433 doublets. (\*\*p<0.001, Chi-square test).

434 **(B and C)** Numbers of spikes in each burst during social (S) versus object (O)  
435 sniffing for different burst ISI thresholds. All burst events recorded from 233 WT pExc  
436 neurons **(B)** and 258 IRSp53-KO pExc neurons **(C)** during social and object sniffing  
437 were used for analysis. (\*p < 0.05, \*\*p < 0.001, ns, not significant, Chi-square test).

438 See **Supplementary file 2** for statistics. Numerical data used to generate the figure  
439 are available in the **Figure 4—figure supplement 1—source data 1**.

440

441 **Figure 4—figure supplement 1—source data 1**

442 **Source files for burst event composition data in Figure 4—figure supplement 1**

443 The excel file contains the numerical data used to generate Figure 4—figure  
444 supplement 1A–C.

445

446 **Weak responses to social and object targets in IRSp53-KO pExc mPFC**  
447 **neurons**

448 In the linear chamber, mice can actively explore the targets or spend time in non-  
449 target areas. We reasoned that, if the firing-rate range of IRSp53-KO mice is  
450 decreased, the magnitude of neuronal responses to the social or object stimulus may  
451 also be decreased. To test this, we divided the linear chamber into five equal-area  
452 sections (each 9-cm in length), and the firing rates in the in-zone areas were  
453 compared to that of the center zone (**Figure 5A**). We defined the maximum  $\Delta$  firing

454 rate of each session as the maximum absolute difference in mean firing rates  
455 between the center zone ( $FR_c$ ) and the two in-zones ( $FR_{l1}$ ,  $FR_{l2}$ ; left and right for E-E  
456 session, social and object for S-O sessions).

457           Compared to WT pExc neurons, IRSp53-KO pExc neurons displayed a  
458 decreased maximum  $\Delta$  firing rate only in the first S-O session of the linear-chamber  
459 test, but not in the E-E or second S-O session (**Figure 5B–D**). IRSp53-KO pExc  
460 neurons showed a general decrease in the normalized maximum  $\Delta$  firing rate (see  
461 Methods) across all three sessions (**Figure 5E**). It is notable that the response  
462 magnitudes of both WT and IRSp53-KO pExc neurons were the highest during the  
463 first S-O session, in response to novel social and object targets. This fits well with  
464 our behavioral data, in which only WT mice, but not IRSp53-KO mice, show social  
465 preference in the first, but not second, S-O session (**Figure 1D–F, Figure 1—figure**  
466 **supplement 2A–C**).

467

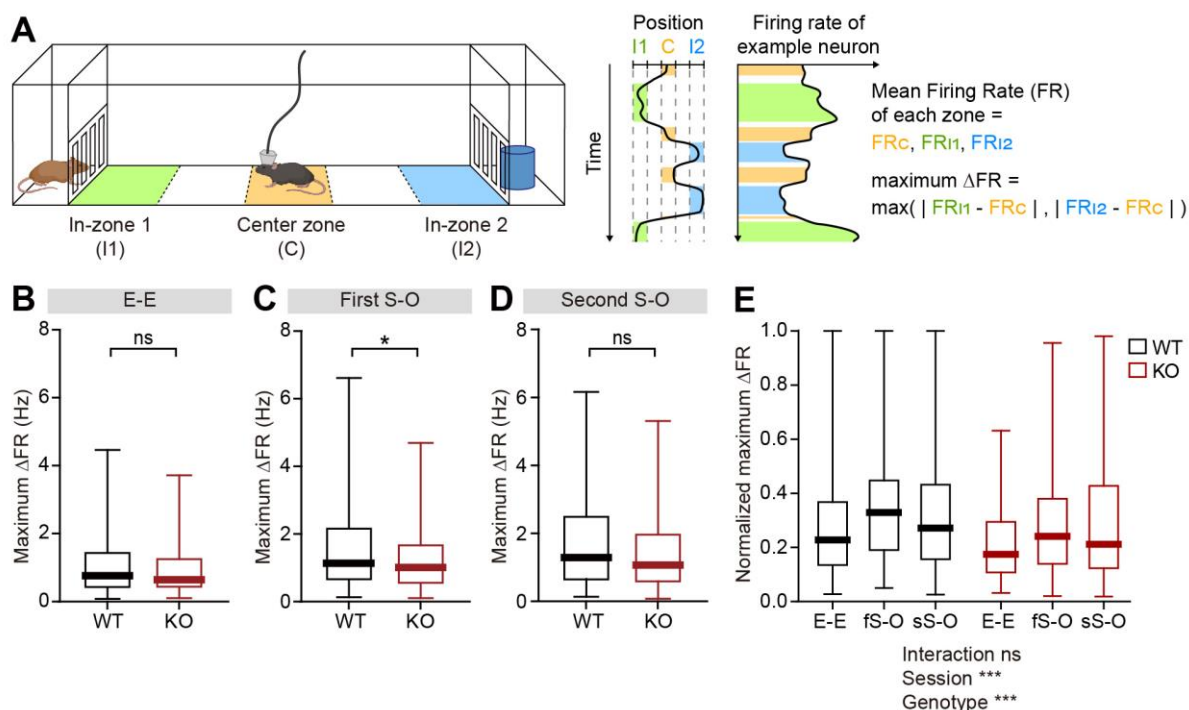

468

469 **Figure 5. Limited firing-rate changes in response to social and object targets in**  
 470 **IRSp53-KO pExc mPFC neurons.**

471 **(A)** Definition of in-zone and center zone. The first and fifth of the equally divided five  
 472 9-cm-long areas were defined as in-zones (I1 and I2, respectively) while the third  
 473 area was defined as the center zone (C). For each neuron, the maximum Δ firing  
 474 rate is defined as the higher value among the firing rate differences between the  
 475 center zone and two in-zones (left and right for E-E session, social and object for S-  
 476 O sessions).

477 **(B–D)** Maximum Δ firing rates of WT and IRSp53-KO pExc neurons during the E-E  
 478 **(B)**, first S-O **(C)**, and second S-O **(D)** sessions. (n = 233 [WT-pExc] and 258 [KO-  
 479 pExc], \*p < 0.05, ns, not significant, Mann-Whitney test).

480 **(E)** Normalized maximum Δ firing rates of WT and IRSp53-KO pExc neurons during  
 481 the E-E, first S-O (fs-O), and second S-O sessions (sS-O). (n = 233 [WT-pExc] and

482 258 [KO-pExc], \*\*\* $p < 0.001$ , ns, not significant, two-way RM-ANOVA).

483 See **Supplementary file 2** for statistics. Numerical data used to generate the figure  
484 are available in the **Figure 5—source data 1**.

485

486 **Figure 5—source data 1**

487 **Source files for firing-rate change data in Figure 5**

488 The excel file contains the numerical data used to generate Figure 5B–E.

489

490 **Limited social versus object firing-rate discriminability in IRSp53-KO pExc**  
491 **mPFC neurons**

492 Since the firing-rate range of IRSp53-KO neurons was found to be limited, especially  
493 in the first S-O session, we hypothesized that the firing-rate discriminability between  
494 social and object targets may also be limited. The slopes of linear regression and the  
495 degrees of dispersion (indicated by 95% confidence interval) for the left versus right  
496 (L vs. R) in-zone firing rates in the E-E session were comparable between genotypes  
497 (**Figure 6A**). In contrast, the slopes of the linear regression lines relating social and  
498 object (S vs. O) firing rates were biased towards the social firing rate in both  
499 genotypes in the first and second S-O sessions, indicating preferential responses to  
500 social to object targets. However, this bias was smaller in IRSp53-KO pExc neurons  
501 compared to WT pExc neurons (**Figure 6B, Figure 6—figure supplement 1A**).  
502 Additionally, the confidence interval was narrower for IRSp53-KO pExc neurons,  
503 especially in the first S-O session, compared to WT pExc neurons for the S versus O  
504 firing rates, suggesting that the former exhibited limited discriminability (**Figure 6B**).

505 Consistently, the absolute difference in the firing rate for S versus O (an indication of  
506 discriminability) in the first S-O session was significantly lower in IRSp53-KO pExc  
507 neurons than WT pExc neurons (**Figure 6C**). Nevertheless, IRSp53-KO pExc  
508 neurons could still discriminate the social targets from object targets significantly  
509 better compared to the left versus right side discrimination in the E-E session  
510 (**Figure 6C**). This result suggests that IRSp53-KO mice have the ability to recognize  
511 social and object stimuli, albeit in reduced degree than WT mice.

512 As shown by the heatmap for the discrimination index (DI; normalized  
513 quantification of discriminability) between two targets (L vs. R or S vs. O), some  
514 neurons showed high firing rates to the left (or social) targets relative to right (or  
515 object) targets, while others showed the opposite response patterns (**Figure 6D, E,**  
516 **Figure 6—figure supplement 1B**). IRSp53-KO pExc neurons with preferential firing  
517 to social than object target had significantly lower discriminability relative to those of  
518 WT neurons during the first S-O session (**Figure 6E**). Such difference between two  
519 genotypes was not observed during the second S-O session.

520

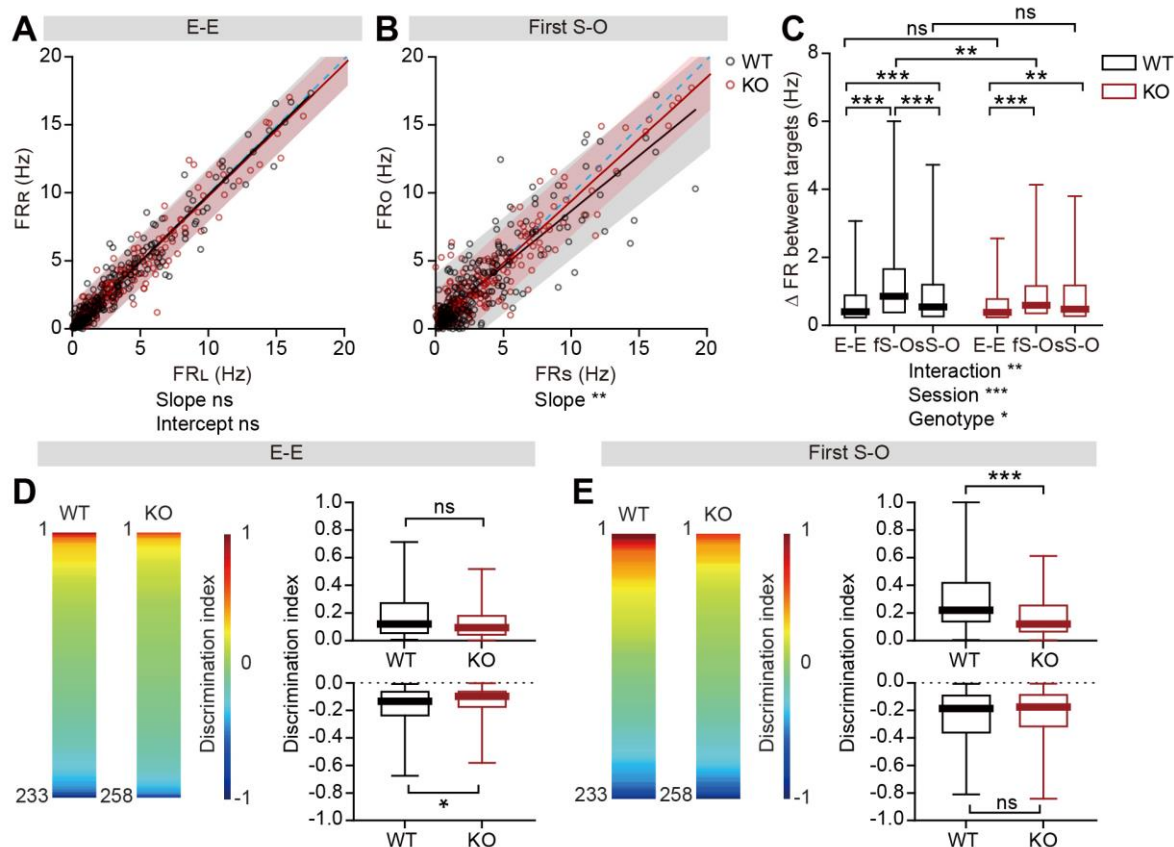

521

522 **Figure 6. Lower firing-rate discriminability between social and object targets in**  
 523 **IRSp53-KO pExc mPFC neurons.**

524 **(A and B)** Scatterplots of left in-zone firing rate (FRL) against right in-zone firing rate  
 525 (FRR) during the E-E session **(A)** and social in-zone firing rate (FRs) against object  
 526 in-zone firing rate (FRo) during the first S-O session **(B)** for WT and IRSp53-KO  
 527 pExc neurons. Solid lines indicate simple linear regressions for WT (black) and KO  
 528 (red) neurons. Shaded areas indicate the 95% confidence intervals for the WT  
 529 (black) and KO (red) firing rates. Blue dashed lines are 45-degree lines. (n = 233  
 530 [WT-pExc] and 258 [KO-pExc], \*\*p < 0.01, ns, not significant, simple linear  
 531 regression with slope comparison test (see Methods)).

532 **(C)** Absolute changes in left versus right in-zone firing rates (E-E session) and social



533 versus object in-zone firing rates (first (fS-O) and second (sS-O) S-O sessions) for  
534 WT and IRSp53-KO pExc neurons. (n = 233 [WT-pExc] and 258 [KO-pExc]), \*p <  
535 0.05, \*\*p < 0.01, \*\*\*p < 0.001, ns, not significant, two-way RM-ANOVA with Sidak's  
536 multiple comparisons test).

537 **(D)** Heatmaps (left) showing the discrimination index representing side  
538 discriminability during the E-E session of individual WT and IRSp53-KO pExc  
539 neurons sorted from 1 to -1 (n = 233 [WT-pExc] and 258 [KO-pExc]). Positive (top, n  
540 = 104 [WT-pExc] and n = 123 [KO-pExc]) and negative (bottom, n = 129 [WT-pExc]  
541 and n = 135 [KO-pExc]) discrimination indexes (right) represent pExc neurons with  
542 left > right and left < right discriminability, respectively, during the E-E session. (\*p <  
543 0.05, ns, not significant, Mann-Whitney test).

544 **(E)** Heatmaps (left) showing the discrimination index representing social vs. object  
545 target discriminability during the first S-O session of individual WT and IRSp53-KO  
546 pExc neurons sorted from 1 to -1 (n = 233 [WT-pExc] and 258 [KO-pExc]). Positive  
547 (top, n = 115 [WT-pExc] and n = 128 [KO-pExc]) and negative (bottom, n = 118 [WT-  
548 pExc] and n = 130 [KO-pExc]) discrimination indexes (right) represent pExc neurons  
549 with social > object and social < object discriminability, respectively, during the first  
550 S-O session. (\*\*\*p<0.001, ns, not significant, Mann-Whitney test).

551 See **Supplementary file 2** for statistics. Numerical data used to generate the figure  
552 are available in the **Figure 6—source data 1**.

553

554 **Figure 6—source data 1**

555 **Source files for firing-rate discriminability data in Figure 6**

556 The excel file contains the numerical data used to generate Figure 6A–E.

557

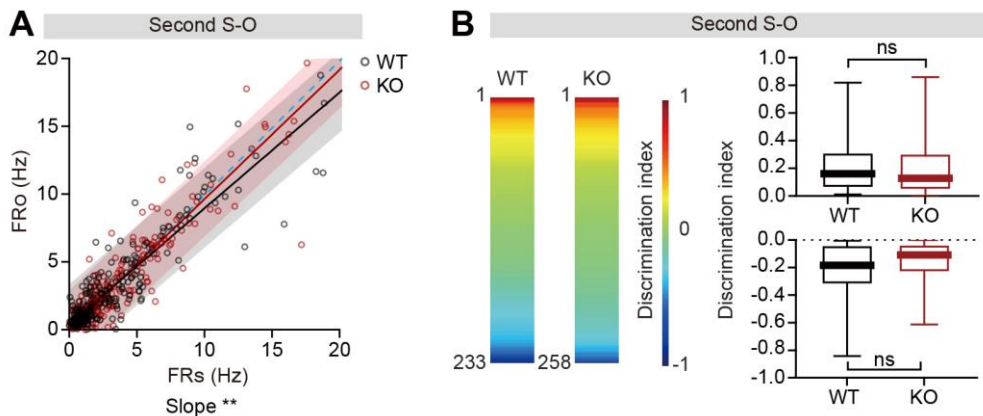

558

559 **Figure 6—figure supplement 1. Normal firing-rate discriminability between**  
560 **social and object targets in IRSp53-KO pExc mPFC neurons in the second S-O**  
561 **session.**

562 **(A)** Scatterplot of social in-zone firing rate (FR<sub>s</sub>) against object in-zone firing rate  
563 (FR<sub>o</sub>) during the second S-O session for WT and IRSp53-KO pExc neurons. Solid  
564 lines indicate simple linear regressions for WT (black) and KO (red) neurons.  
565 Shaded areas indicate the 95% confidence intervals for WT (black) and KO (red)  
566 firing rates. Blue dashed lines are 45-degree lines. (n = 233 [WT-pExc] and 258 [KO-  
567 pExc], \*\*p < 0.01, simple linear regression with slope comparison test).

568 **(B)** Heatmaps (left) showing the discrimination index representing social and object  
569 target discriminability during the second S-O session for individual WT and IRSp53-  
570 KO pExc neurons sorted from 1 to -1 (n = 233 [WT-pExc] and 258 [KO-pExc]).  
571 Positive (top, n = 114 [WT-pExc] and n = 134 [KO-pExc]) and negative (bottom, n =

572 119 [WT-pExc] and n = 124 [KO-pExc]) discrimination indexes (right) represent pExc  
573 neurons with social > object and social < object discriminability, respectively, during  
574 the second S-O session. (ns, not significant, Mann-Whitney test).

575 See **Supplementary file 2** for statistics. Numerical data used to generate the figure  
576 are available in the **Figure 6—figure supplement 1—source data 1**.

577

578 **Figure 6—figure supplement 1—source data 1**

579 **Source files for firing-rate discriminability data in Figure 6—figure supplement**  
580 **1**

581 The excel file contains the numerical data used to generate Figure 6—figure  
582 supplement 1A–B.

583

584 **Decreased social-responsive neuronal proportion in the mPFC of IRSp53-KO**  
585 **mice**

586 The results so far suggest that the mPFC pExc neurons of IRSp53-KO mice may be  
587 less efficient in encoding social information, potentially leading to a decline in the  
588 proportion of social target-responsive neurons in IRSp53-KO mice. We analyzed  
589 neuronal activity during the three linear chamber sessions (E-E, first S-O, and  
590 second S-O sessions) and determined empty-, social-, and object target-responsive  
591 neurons (termed empty, social, and object neurons hereafter) as those whose firing  
592 at the target sniffing zone differed from that in the center zone ( $|z\text{-score}| \geq \text{cut-off}$   
593 value; see Methods). Because the optimal z-score cut-off value is not known a priori,  
594 the proportions of social, object, empty neurons were calculated for a range of z-

595 score cut-off values (0.00–2.58; p-value 0.01–1.00), and the resulting values were  
596 subject to curve fitting. We found that the fitted curves differed significantly between  
597 WT and IRSp53-KO mice for social neurons; a significantly lower proportion was  
598 classified as social neurons among IRSp53-KO pExc neurons compared to WT pExc  
599 neurons (**Figure 7A**), whereas the proportions of object neurons and empty neurons  
600 were comparable between genotypes (**Figure 7B, Figure 7—figure supplement**  
601 **1A**).

602 In order to determine whether the social, object, and empty neurons increase  
603 or decrease their firing rates upon target sniffing, we generated the average  
604 peristimulus time histograms (PSTHs) for WT and IRSp53-KO target neurons filtered  
605 by a z-score cut-off value of 1.0 (positive response neurons: z-score  $\geq 1.0$ , negative  
606 response neurons: z-score  $\leq -1.0$ ). We found both positive and negative response  
607 target neurons (i.e., those increasing and decreasing their firing rates upon sniffing  
608 onset, respectively) in WT as well as IRSp53-KO mice (**Figure 7C,D, Figure 7—**  
609 **figure supplement 1B**).

610 The numbers of target neurons were plotted in Venn diagrams (**Figure 7E**).  
611 The majority of social neurons were positive response neurons (**Figure 7F**), which is  
612 consistent with a previous report (Lee et al., 2016). In addition, the normalized  $\Delta$   
613 firing rate (i.e., target sniffing zone firing – center zone firing) of the positive target  
614 neurons was significantly lower in IRSp53-KO mice than WT mice (**Figure 7G**).

615 The decreases in the proportion of social-responsive pExc neurons and the  
616 response magnitude of target neurons may be associated with the social impairment  
617 seen in IRSp53-KO mice.

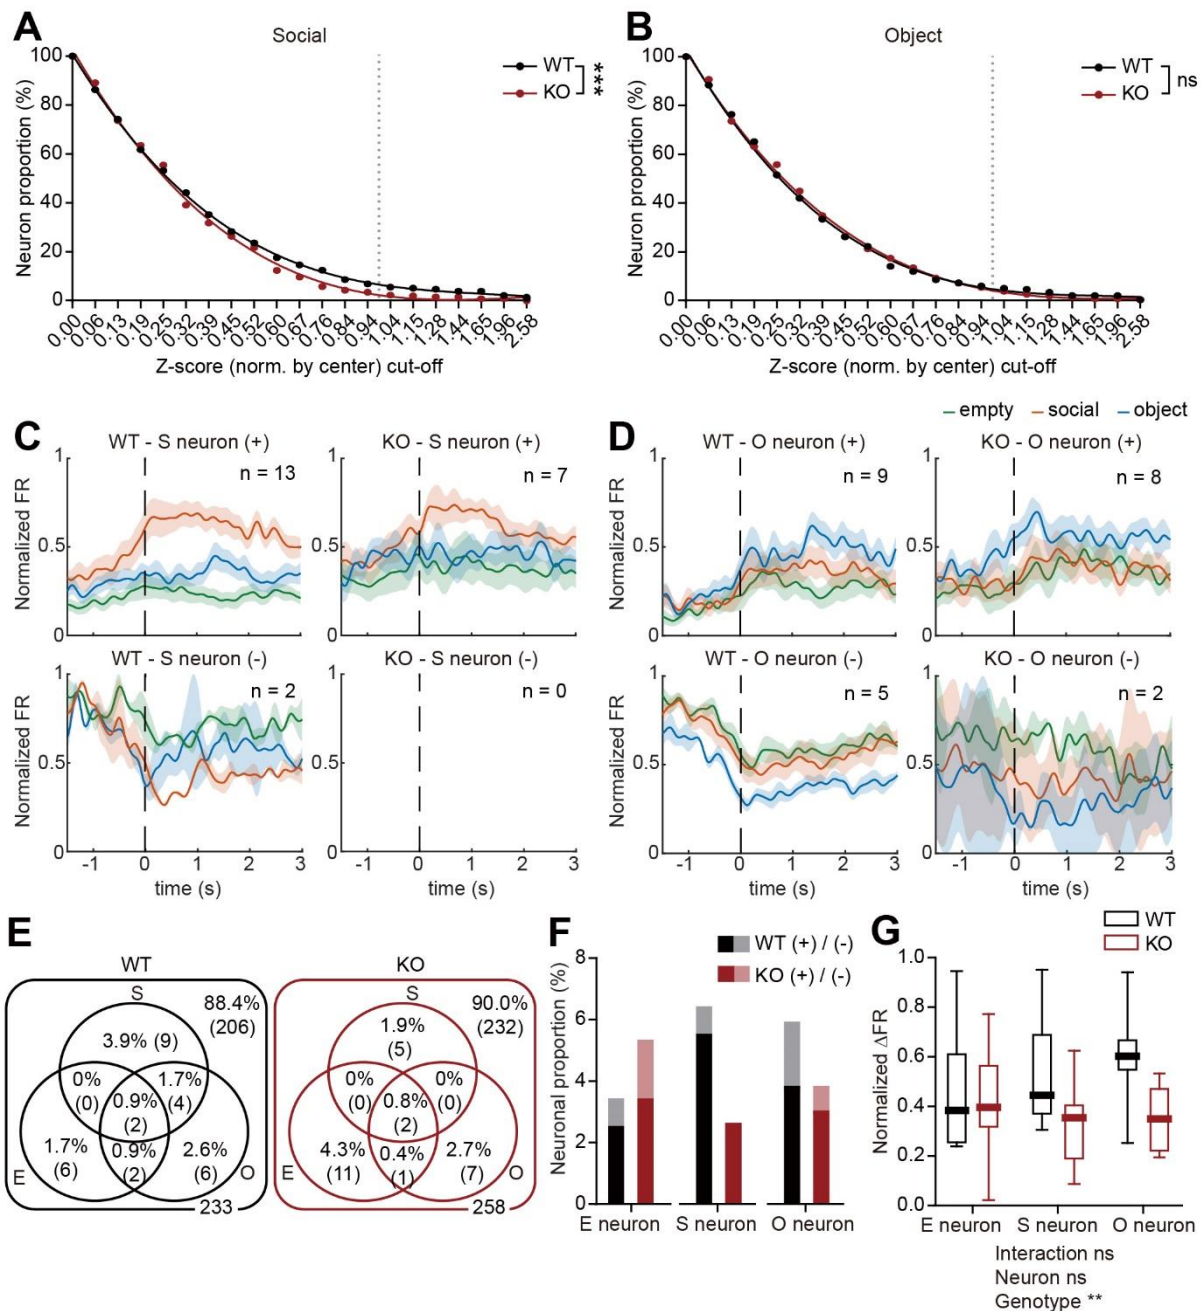

618

619 **Figure 7. Decreased proportion of social pExc neurons in the mPFC of IRSp53**

620 **KO mice.**

621 **(A and B)** Social **(A)** and object **(B)** neuronal proportions out of 233 WT pExc

622 neurons and 258 IRSp53-KO pExc neurons, obtained using a z-score cut-off range

623 of 0 to 2.58. For each neuron, the mean z-scores of firing rates obtained during

624 social and object sniffing were normalized by the firing rates obtained at the center

625 zone. See Methods for details on z-score calculation. Solid lines indicate nonlinear  
626 fitted lines for the WT (black) and IRSp53-KO (red) groups. Dotted lines indicate z-  
627 score cut-off value of 1.0. Note that the social neuron proportion, but not the object  
628 neuron proportion, is significantly different between the genotypes. (\*\*p < 0.001, ns,  
629 not significant, comparison of non-linear fits (see Methods)).

630 **(C and D)** Average peristimulus time histograms (PSTHs) of firing rate responses to  
631 empty (green), social (orange), and object (blue) targets (aligned to the onset of  
632 sniffing) for all social (S; **C**) and object (O; **D**) neurons. The pExc neurons were  
633 filtered by a z-score cut-off value of 1.0. Social and object neurons are divided by  
634 genotype (WT left, IRSp53-KO right) and response direction (positive (+) top,  
635 negative (-) bottom). Positive and negative response neurons increase and decrease  
636 their firing rate, respectively, upon sniffing onset. Total numbers of neurons are  
637 indicated at the upper left corner of each PSTH. Shading indicates  $\pm$ SEM.

638 **(E)** Venn diagram summary of target neuronal proportions for WT (left) and IRSp53-  
639 KO (right) pExc neurons (n = 233 [WT-pExc] and 258 [KO-pExc]). Numbers indicate  
640 neuronal proportion % (n neurons). E, empty, S, social, O, object.

641 **(F)** Neuronal proportions for WT (black) and IRSp53-KO (red) positive and negative  
642 empty, social and object pExc neurons. Note that the majority of social target  
643 neurons respond positively to the social target. Note also that the IRSp53-KO social  
644 neuronal proportion is less than 50% (7/15) of the corresponding proportion for WT.

645 **(G)** Normalized  $\Delta$  firing rate between firing rate at the target sniffing zone versus that  
646 at the center zone for positive response target neurons (empty neuron, n = 6 [WT-  
647 pExc] and n = 9 [KO-pExc]; social neuron, n = 13 [WT-pExc] and n = 7 [KO-pExc];

648 object neuron, n = 9 [WT-pExc] and n = 8 [KO-pExc], \*\*p<0.01, ns, not significant,  
649 two-way RM-ANOVA with Sidak's multiple comparison's test).

650 See **Supplementary file 2** for statistics. Numerical data used to generate the figure  
651 are available in the **Figure 7—source data 1**.

652

### 653 **Figure 7—source data 1**

#### 654 **Source files for target neuron data in Figure 7**

655 The excel file contains the numerical data used to generate Figure 7A, B, F and G .

656

### 657 **Normal proportion of broadly-tuned target pExc neurons in the mPFC of** 658 **IRSp53-KO mice**

659 While the majority of target neurons were specific to a single target (single-tuned  
660 neurons), several target neurons were responsive to multiple targets (broadly-tuned  
661 neurons; **Figure 7E**). Examination of the PSTHs for examples of single-tuned and  
662 broadly-tuned neurons revealed that the target discriminability of WT and IRSp53-  
663 KO single-tuned neurons appeared to be higher than that of a subset of broadly-  
664 tuned neurons (**Figure 7—figure supplement 2A,B**). We found, however, that the  
665 overall proportions of single-tuned and broadly-tuned neurons were comparable  
666 between genotypes (**Figure 7—figure supplement 2C,D**).

667

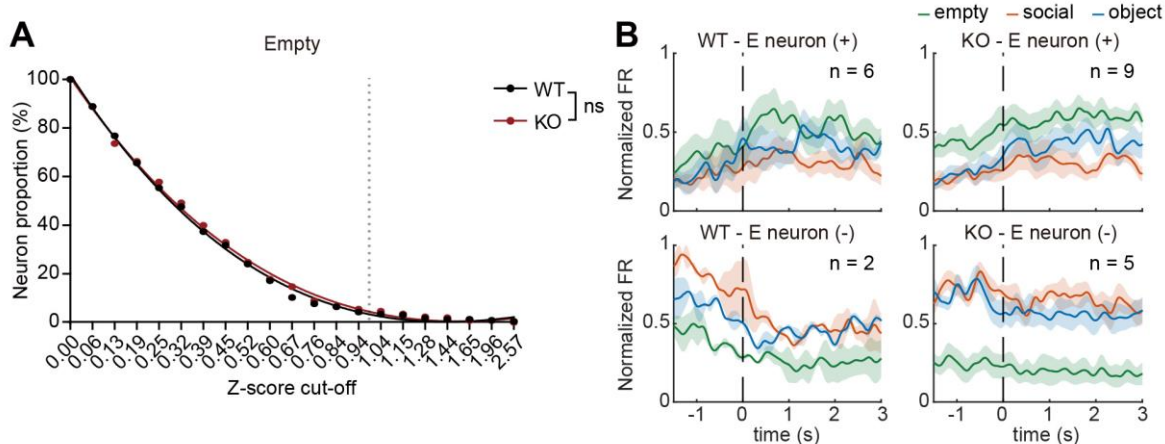

668

669 **Figure 7—figure supplement 1. Normal proportion of empty pExc neurons in**  
670 **the mPFC of IRSp53-KO mice.**

671 **(A)** Empty neuronal proportions for 233 WT pExc neurons and 258 IRSp53-KO pExc  
672 neurons using a z-score cut-off range of 0 to 2.58. For each neuron, the mean z-  
673 scores of firing rates obtained during empty sniffing were normalized by the firing  
674 rates obtained at the center zone. See Methods for details on z-score calculation.  
675 Solid lines indicate the nonlinear fitted lines for the WT (black) and IRSp53-KO (red)  
676 groups. Dotted lines indicate z-score cut-off value of 1.0. (ns, not significant,  
677 comparison of nonlinear fits (see Methods)).

678 **(B)** Average PSTHs of firing rate responses to empty (green), social (orange), and  
679 object (blue) targets (aligned to the onset of sniffing) for all empty pExc neurons  
680 filtered by a z-score cut-off value of 1.0. Empty neurons are divided by genotype (WT  
681 left, IRSp53-KO right) and response direction (positive (+) top, negative (-) bottom).  
682 Positive and negative response neurons increase and decrease their firing rate,  
683 respectively, upon sniffing onset. Total numbers of neurons are indicated at the upper  
684 left corner of each PSTH. Shading indicates  $\pm$ SEM.

685 See **Supplementary file 2** for statistics. Numerical data used to generate the figure



686 are available in the **Figure 7—figure supplement 1—source data 1**.

687

688 **Figure 7—figure supplement 1—source data 1**

689 **Source files for empty neuron data in Figure 7—figure supplement 1**

690 The excel file contains the numerical data used to generate Figure 7—figure

691 supplement 1A.

692

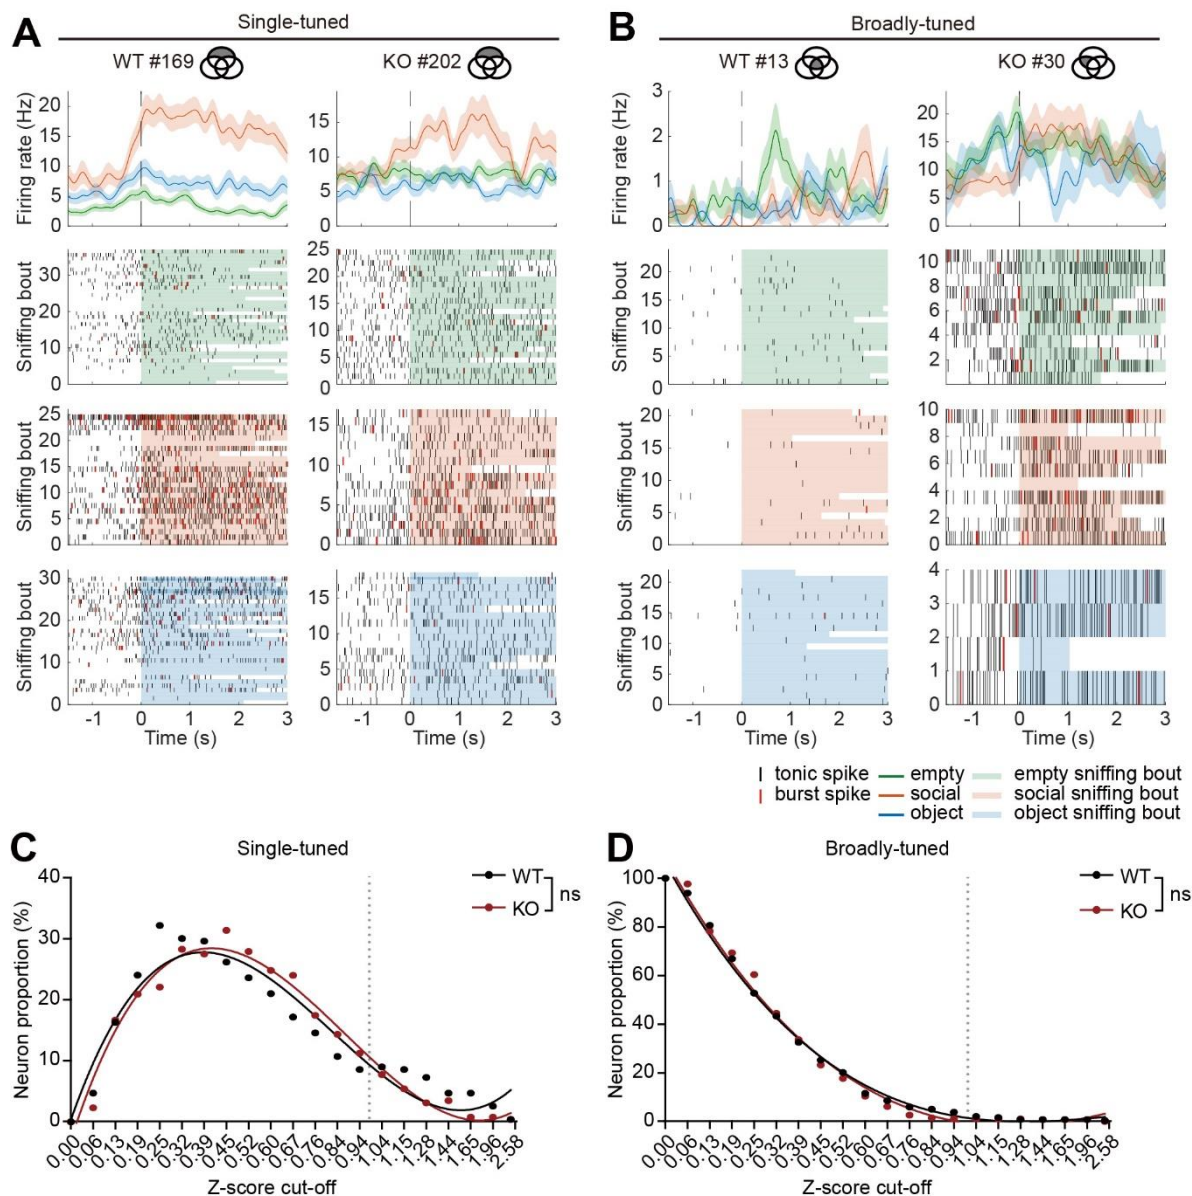

693

694 **Figure 7—figure supplement 2. Comparable proportions of single-tuned and**  
 695 **broadly-tuned pExc neurons in mPFC of IRSp53-KO mice.**

696 **(A and B)** Average PSTHs (top) and spike raster plots (bottom) of target sniffing  
 697 responses (aligned to the onset of sniffing) for a single-tuned **(A)** and a broadly-  
 698 tuned **(B)** WT social (left) and IRSp53-KO social (right) example pExc neurons.

699 Single-tuned and broadly-tuned neurons are at the non-overlapping and overlapping  
 700 regions of the Venn diagram (Figure 7E), respectively. Shading in PSTH indicates

701  $\pm$ SEM across sniffing trials.

702 **(C and D)** Single-tuned (**C**) and broadly-tuned (**D**) neuronal proportions obtained  
703 from 233 WT pExc neurons and 258 IRSp53-KO pExc neurons using a z-score cut-  
704 off range of 0 to 2.58. Solid lines indicate nonlinear fitted lines for the WT (black) and  
705 IRSp53-KO (red) groups. Dotted lines indicate z-score cut-off value of 1.0. (ns, not  
706 significant, comparison of nonlinear fits (see Methods)).

707 See **Supplementary file 2** for statistics. Numerical data used to generate the figure  
708 are available in the **Figure 7—figure supplement 2—source data 1**.

709

710 **Figure 7—figure supplement 2—source data 1**

711 **Source files for target neuron data in Figure 7—figure supplement 2**

712 The excel file contains the numerical data used to generate Figure 7—figure  
713 supplement 2C and D.

714

## 715 **Discussion**

716 The present study investigated abnormalities in social representation and neuronal  
717 firing patterns in the mPFC of IRSp53-KO mice. A key finding of the study is that  
718 social deficits in IRSp53-KO mice are associated with impaired social representation  
719 in the mPFC, which relates to a decreased firing rate variability and limited firing-rate  
720 range in IRSp53-KO putative excitatory neurons. The reduction in the firing-rate  
721 range is accompanied by a significant decrease in the response magnitudes to social  
722 and non-social targets and a limited discriminability of social and non-social cues.

723 Previous studies suggested that disruption of the excitation/inhibition balance  
724 (E/I imbalance) can cause abnormal social behaviors (Lee et al., 2017; Nelson and  
725 Valakh, 2015; Sohal and Rubenstein, 2019). This concept of an E/I imbalance can be  
726 applied to multiple mechanistic levels, ranging from synapses to neurons and neural  
727 circuits. Elevation of the E/I ratio, via optogenetic excitation of mPFC pyramidal  
728 neurons, was reported to impair social behavior in WT mice and decrease the  
729 synaptic current-mediated firing-rate ranges of neurons to suppress the dynamic  
730 range of information transfer (Yizhar et al., 2011). Here, we provide an in vivo  
731 example of this concept by demonstrating that IRSp53-KO mPFC excitatory neurons  
732 show increased spontaneous firing activity but a limited firing-rate range during  
733 social and non-social cue exploration.

734 The heightened firing rates of mPFC pExc neurons in IRSp53-KO mice  
735 during the rest period may be attributable to the increased intrinsic excitability of  
736 pyramidal mPFC neurons, as reported in IRSp53-KO mice with gene deletion  
737 restricted to excitatory neurons (Kim et al., 2020). An elevated firing rate at rest was  
738 observed for mPFC neurons in socially impaired *Cntnap2*-KO mice; this was

739 correlated with a reduction in the signal-to-noise ratio and disruption of social  
740 sensory stimuli representation (Levy et al., 2019). Likewise, we herein report that  
741 IRSp53-KO mPFC excitatory neurons may also have ‘noisy’ properties that disrupt  
742 the reliable filtration and transduction of important signals, such as social cues.

743         Suppressed excitatory synaptic transmission accompanying reduced  
744 dendritic spine density and cognitive and social declines has been frequently  
745 observed in mouse models of neuropsychiatric disorders, including IRSp53-KO,  
746 Shank2-KO, Cntnap2-KO, and Syngap1-KO mice (Chung et al., 2015; Clement et  
747 al., 2012; Lazaro et al., 2019; Schmeisser et al., 2012). In our study, the limited  
748 firing-rate range of IRSp53 pExc neurons is expressed as reduced response  
749 magnitudes to social and non-social cues and a decreased ability to discriminate  
750 social and non-social cues. These insufficient firing-rate responses to external cues  
751 may be attributable to the cortical decreases in excitatory synapse density, dendritic  
752 spine density, and postsynaptic density (PSD) maturity seen in IRSp53-KO mice  
753 (Chung et al., 2015), which would substantially limit the amount of information  
754 delivered to and integrated at the mPFC under social contexts.

755         Dysfunctions of NMDA receptors have been associated with social deficits in  
756 mouse models of psychiatric disorders (Chung et al., 2019; Lee et al., 2021b; Lee et  
757 al., 2015; Mielnik et al., 2021; Shin et al., 2020; Won et al., 2012; XiangWei et al.,  
758 2018). In addition, IRSp53-KO mice show NMDAR hyperfunction and memantine  
759 treatment-dependent rescue of social deficits (Bobsin and Kreienkamp, 2015; 2016;  
760 Chung et al., 2015; Kim et al., 2009). Intriguingly, modulation of NMDAR activity has  
761 substantial influences on the firing rate, burst activity, and firing variability of PFC  
762 neurons in vivo (Homayoun and Moghaddam, 2006). In line with these findings, we

763 herein report that IRSp53-KO mPFC pyramidal neurons show decreased burst firing  
764 and firing variability. It would be interesting to investigate whether memantine  
765 treatment of IRSp53-KO mice, which rescues social deficits, could also normalize the  
766 decreased burst and firing variability and the abnormal social representation in  
767 mPFC neurons.

768         The most salient feature observed herein for IRSp53-KO mPFC neurons is  
769 the reduced proportion of social neurons, but not those for other targets, that is  
770 consistently observed across all z-score cut-off ranges. Disruptions in the cortical  
771 social representation of social contexts have been reported in several studies of ASD  
772 models (Cao et al., 2018a; Lee et al., 2021a; Lee et al., 2021b; Levy et al., 2019).  
773 The present study further highlights the importance of a reduced social/non-social  
774 encoding neuron ratio in social deficits. It should be pointed out, however, that it  
775 remains unclear whether the limited social cortical representation that is strongly  
776 associated with social deficits represents the cause of limited social brain functions,  
777 versus being an outcome of reduced social interaction or even limited sensory input.  
778 The abovementioned pharmacological rescue experiments attempting to correct both  
779 cortical social representation and social behaviors might help clarify this causal  
780 relationship.

781         In summary, our current results indicate that IRSp53-KO mice display  
782 elevated spontaneous firing and reduced firing variability and range in mPFC  
783 neurons, which may suppress cortical social representation and induce behavioral  
784 social deficits.

785

786 **Materials and Methods**

787

788 **Animals**

789 Adult (3–5 months old) C57B/6J male WT (n = 6) and IRSp53-KO (n = 8) mice were  
790 used for single-unit recording. Mice were fed *ad libitum* and maintained under 12-h  
791 light/dark cycle (light period 1 am–1 pm). All experiments were conducted during the  
792 dark phase (1 pm–1 am) of the light/dark cycle. The mouse facility and experimental  
793 setting were always maintained at 21°C and 50–60% humidity. Mice were  
794 maintained according to the Animal Research Requirements of Korea Advanced  
795 Institute of Science and Technology (KAIST). All experiments were conducted with  
796 approval from the Committee on Animal Research at KAIST (approval number  
797 KA2020-94).

798

799 **Linear-chamber social-interaction test**

800 Before linear-chamber social-interaction test (Lee et al., 2017), the subject mouse  
801 was placed in a white 7.5 cm radius x 15 cm opaque acryl container for neural  
802 recording at rest. The mouse was then allowed to explore the 45 cm x 10 cm x 21  
803 cm linear chamber with the empty-empty chambers (E-E session), the social-object  
804 chambers (first S-O session), and then the same object-social chambers with the  
805 side exchanged (second S-O session), for 10 minutes each. The social and object  
806 targets used for each experiment were always novel. Novel male 129/Sv mice of  
807 similar age were used as the social target. The initial placement of social and object  
808 targets into left or right chambers in the first S-O session were randomly chosen

809 before each experiment. All recordings were conducted at 30 lux. A total of 12  
810 recording experiments were conducted for each mouse, with 3 days of isolation  
811 interval.

812

### 813 *Mice movement tracking*

814 Mice movements were monitored by a digital camera mounted on the ceiling, directly  
815 above the linear chamber assay. The position of the mouse's nose, right and left  
816 ears, and tail-base, and four corner points of the linear chamber were tracked using a  
817 pose estimation software DeepLabCut (version 2.0; Mathis et al., 2018).

818

### 819 *Behavioral analysis*

820 Sniffing time was defined as the time when the nose point is within 3 cm from the  
821 face of each target chamber. In-zone time was defined as the time when the body  
822 center (midpoint between nose point and tail base) is within 9 cm from the face of  
823 each target chamber.

824

### 825 **Single-unit recording**

826 Eight tetrodes were implanted in the mPFC (four tetrodes per hemisphere; 1.7–2.1  
827 mm anterior and 0.1–0.5 mm lateral from bregma, and 1.5–2.3 mm ventral from  
828 brain surface). 36-channel electrode interface board (EIB-36; Neuralynx, Bozeman,  
829 MT, USA) and hyperdrive (modified version of Flex drive from Open Ephys) were  
830 used. Mice were subjected to 3 days of handling (10 min each day) after 1 week of



831 recovery from surgery. At the first exposure to the linear chamber test, mice were  
832 habituated to the environment and tether but without recording. After habituation,  
833 mice were subjected to 12 linear-chamber experiments with recording. 10,000x  
834 amplified single-unit recording signals with 32kHz sampling frequency were filtered  
835 using a bandpass filter of 600–6000 Hz. Signals were recorded via Digitalynx  
836 (hardware; Neuralynx, Bozeman, MT, USA) and Cheetah data-acquisition system  
837 (software version 5.0; Neuralynx, Bozeman, MT, USA) and stored in a personal  
838 computer. In order to record different units at each recording experiment, the  
839 positions of tetrodes were lowered by 62.5  $\mu\text{m}$  after the recording.

840

#### 841 *Histology*

842 After the 12th recording, mice were deeply anesthetized and the locations of the  
843 tetrodes were marked by electrolytic lesion (100  $\mu\text{A}$  unipolar current for 7 sec for  
844 each electrode) and brains were extracted and perfused in 4% Paraformaldehyde  
845 (PFA) solution for at least 72 hours. The fixed brains were sliced coronally (50  $\mu\text{m}$ )  
846 using a vibratome (VT1000; Leica, Buffalo Grove, IL, USA), stained with DAPI, and  
847 the positions of lesions were assessed by post hoc histological evaluation using a  
848 confocal microscope (LSM780; Carl Zeiss, Oberkochen, Germany).

849

#### 850 **Spike analysis**

851 The single-unit spike clusters were isolated manually by spike waveform features,  
852 such as, energy, peak, valley, and principal components, using MClust (version 4.4,  
853 available online at <http://redishlab.neuroscience.umn.edu/mclust/MClust.html>); credits

854 to A. David Redish). Only units with isolation distance of  $\geq 25$  and L-ratio of  $\leq 0.1$   
855 were used for analysis.

856 Only valid sniffing trials and valid in-zone (and center zone) trials were used  
857 for spike analysis. Valid sniffing trials were defined as those with a duration of  $\geq 1$   
858 sec and inter-trial interval of  $\geq 2$  sec. For sufficient acquisition of center zone trials,  
859 valid in-zone (and center zone) trials were defined as those with a duration of  $\geq 0.5$   
860 sec and inter-trial interval of  $\geq 0.5$  sec. Neurons with missing valid sniffing and in-  
861 zone trials for any of the six targets (left and right for the E-E session, social and  
862 object for the first and second S-O sessions) were excluded from spike analysis. The  
863 number of neurons recorded after the valid trial exclusion was WT  $n = 391$  total  
864 neurons, 366 pExc neurons, 17 plnh neurons from 6 mice and IRSp53-KO  $n = 394$   
865 total neurons, 359 pExc neurons, 24 plnh neurons from 8 mice (see Supplementary  
866 file 1 for details). The pExc and plnh neurons were classified based on half-valley  
867 width (pExc: HVW  $> 200$  ms, plnh: HVW  $< 200$  ms) and peak-to-valley ratio (pExc:  
868 PVR  $> 1.4$ , plnh: PVR  $< 1.4$ ).

869 Except for the comparison of mean firing rate at rest (total number of spikes  
870 within 5-min resting duration), only pExc neurons with the average firing rate of  $\geq 0.5$   
871 Hz during the 30-min linear chamber assay were used for further analysis. After  $\geq 0.5$   
872 Hz filtration, the total number of pExc neurons were WT  $n = 233$  neurons from 6 mice  
873 and IRSp53-KO  $n = 258$  neurons from 8 mice (see Supplementary file 1 for details).

874

### 875 *Instantaneous firing rate and firing rate variability analysis*

876 For instantaneous firing rate analysis, the 30-min linear chamber period were divided

877 into 1800 time-bins (3-sec time-bin of 1-sec steps). The sigma (Hz) value for each  
878 neuron was defined as the 1 standard deviation (1SD; includes 68% of data) value of  
879 the 1800 instantaneous firing rates. The normalized instantaneous firing rate of each  
880 neuron was calculated by dividing the instantaneous firing rates by the maximum  
881 instantaneous firing rate.

882

### 883 *ISI and Burst analysis*

884 Interspike interval (ISI) is the time between two consecutive spikes (in ms). For the  
885 average ISI histogram, ISIs  $\leq 200$  ms were extracted for each neuron, and the ISI  
886 histogram values of individual neurons were averaged. The coefficient of variation  
887 (CV) of ISI for each neuron was calculated as  $\sigma_{\text{ISI}}/\mu_{\text{ISI}}$ , in which  $\sigma_{\text{ISI}}$  is the 1SD of  
888 ISI and  $\mu_{\text{ISI}}$  is the mean of ISI.

889 Burst proportion (%) was defined as the number of burst spikes out of the  
890 total number of spikes in a neuron, in which the burst spikes are defined as all  
891 consecutive spikes with an ISI  $\leq 10$  ms. To demonstrate the cut-off effects of ISI  
892 burst definition, burst analysis was performed using a range of burst ISI threshold  
893 values (5 – 30 ms).

894 To compare the composition of the burst events between genotypes, all burst  
895 events were classified into doublet, triplet and  $\geq 4$  spike groups according to the  
896 number of spikes in individual burst events. The proportions of burst events by spike  
897 count were then compared between genotypes via Chi-square analysis.

898

899 *Maximum  $\Delta$  firing rate analysis*

900 The maximum  $\Delta$  firing rate of a neuron is the maximum value between the absolute  
901 firing rate differences between the firing rates at the two in-zones and the firing rate  
902 at the center zone ( $|FR_{I1} - FR_C|$  and  $|FR_{I2} - FR_C|$ ) where  $FR_C$  is the firing rate at the  
903 center zone and  $FR_{I1}$  and  $FR_{I2}$  are the firing rates at two in-zones). The two in-zones  
904 are left and right for the E-E session, and social and object for the first and second  
905 S-O sessions.

906 The normalized maximum  $\Delta$  firing rate is the maximum value between  
907 absolute normalized firing rate differences between the firing rates at two in-zones  
908 and the firing rate at the center zone ( $|FR_{I1} - FR_C|/(FR_{I1} + FR_C)$  and  $|FR_{I2} -$   
909  $FR_C|/(FR_{I2} + FR_C)|$ ).

910

911 *Discrimination index analysis*

912 The neuron's discriminability between targets was assessed by calculating the  
913 discrimination index, which is the normalized firing rate differences between the firing  
914 rates at the two in-zones:  $(FR_L - FR_R)/(FR_L + FR_R)$  for the E-E session and  $(FR_S -$   
915  $FR_O)/(FR_S + FR_O)$  for the S-O sessions where  $FR_L$ ,  $FR_R$ ,  $FR_S$ , and  $FR_O$  are the mean  
916 firing rate at left, right, social, and object in-zones, respectively.

917

918 *Target (empty, social, object) neuron analysis*

919 For each neuron, the average firing rate during the valid sniffing time of empty (E),  
920 social (S), and object (O) targets were calculated. Its center zone time in the E-E,

921 first S-O, and second S-O sessions were extracted, divided into 0.5-sec time-bins,  
922 and its instantaneous firing rates were calculated. The z-scores for each neuron  
923 were defined as  $(FR_T - \mu_C)/\sigma_C$ , in which  $FR_T$  is the mean firing rate during target (E, S,  
924 or O) sniffing, while  $\mu_C$  and  $\sigma_C$  are the mean and 1SD of the instantaneous firing  
925 rates at the center zone, respectively.

926 A range of z-score thresholds (0 – 2.58) was used to determine the neurons  
927 that are responsive to E, S, O targets. The proportions of WT and IRSp53-KO pExc  
928 target neurons (the number of target neurons out of the number of total neurons  
929 (in %)) were considered statistically different if the nonlinear fitted lines (third-order  
930 polynomial fit; across all calculated neuronal proportions for 0 – 2.58 z-score  
931 threshold range) were significantly different (via comparison of fits in Prism 9.0;  
932 GraphPad, San Diego, CA, USA). Z-score threshold value of 1.0 (positive response  
933 neuron: z-score  $\geq 1.0$ , negative response neuron: z-score  $\leq -1.0$ ) was used for  
934 generating peristimulus time histograms (PSTHs) and comparing the normalized  $\Delta$   
935 firing rates of target neurons.

936 For PSTH of an individual neuron, firing rates were calculated in 250-ms bins  
937 (from -1.5 sec to 3 sec after the onset of target sniffing) and averaged across the  
938 sniffing trials. For the averaged PSTH of target neurons, the averaged firing rates of  
939 individual neurons were normalized by their maximum firing rate, and then averaged  
940 across all target neurons.

941 The normalized  $\Delta$  firing rate of positive response target neurons is the  
942 normalized difference between the firing rates at the target zone (empty, social, or  
943 object depending on which target the target neuron is responsive to) and the center  
944 zone:  $(FR_T - FR_C)/(FR_T + FR_C)$  where  $FR_C$  is the firing rate at the center zone and  $FR_T$

945 is the firing rate at the target zones. Target zones fall in the area within 9 cm from the  
946 front face of the target chamber (same as in-zones).

947

## 948 **Statistical analysis**

949 Statistical significance was determined via repeated measures of two-way ANOVA  
950 with Sidak's multiple comparisons test (or Bonferroni's multiple comparisons test),  
951 Friedman test with Dunn's multiple comparisons test, Mann-Whitney test, simple  
952 linear regression with slope comparisons test, nonlinear fit with comparisons of fits,  
953 and Chi-square test (all via Prism 9.0; GraphPad, San Diego, CA, USA).  
954 Kolmogorov-Smirnov normality test was used to determine whether to use a  
955 parametric or nonparametric test. Graphs were generated by MATLAB 2020a  
956 (MathWorks, Natick, MA, USA) and Prism 9.0. All box and whisker plots show  
957 median, interquartile range, and 2.5 and 97.5 percentile. See **Supplementary file 2**  
958 for details on statistics.

959

## 960 **Supplementary file 1**

961 Table 1. Recorded neuron number for each mouse

962

## 963 **Supplementary file 2**

964 Details on the statistical tests and p-value.

965

966 **Acknowledgments**

967 We would like to thank Changho Jo and Seohui Bae for their help with DeepLabCut.

968 This study was supported by the National Research Foundation of Korea (NRF)  
969 grants (No. NRF-2019R1A2C4069863 to S.P.), a faculty research grant of Yonsei  
970 University College of Medicine (6-2020-0089 to E.L.), Korea Research Foundation  
971 (NRF-2019R1A2C1084812 to E.L.), IBS-R002-D2 (to M.W.J.), and IBS-ROO2-D1 (to  
972 E.K.). Figure 1A, 1C, 2C, and 5A were created with BioRender.com.

973

974 **Competing interests**

975 The authors declare no competing financial interests.

976

977 **References**

978 Bobsin, K., and Kreienkamp, H.J. (2015). Severe learning deficits of IRSp53 mutant mice are caused  
979 by altered NMDA receptor dependent signal transduction. *J Neurochem*. 10.1111/jnc.13428.

980 Bobsin, K., and Kreienkamp, H.J. (2016). Severe learning deficits of IRSp53 mutant mice are caused  
981 by altered NMDA receptor-dependent signal transduction. *J Neurochem* 136, 752-763.  
982 10.1111/jnc.13428.

983 Burette, A.C., Park, H., and Weinberg, R.J. (2014). Postsynaptic distribution of IRSp53 in spiny  
984 excitatory and inhibitory neurons. *J Comp Neurol* 522, 2164-2178. 10.1002/cne.23526.

985 Cao, W., Lin, S., Xia, Q.Q., Du, Y.L., Yang, Q., Zhang, M.Y., Lu, Y.Q., Xu, J., Duan, S.M., Jun, X., et al.

- 986 (2018a). Gamma Oscillation Dysfunction in mPFC Leads to Social Deficits in Neuroigin 3 R451C  
987 Knockin Mice. *Neuron*. 10.1016/j.neuron.2018.02.001.
- 988 Cao, W., Lin, S., Xia, Q.Q., Du, Y.L., Yang, Q., Zhang, M.Y., Lu, Y.Q., Xu, J., Duan, S.M., Xia, J., et al.  
989 (2018b). Gamma Oscillation Dysfunction in mPFC Leads to Social Deficits in Neuroigin 3 R451C  
990 Knockin Mice. *Neuron* 98, 670. 10.1016/j.neuron.2018.04.025.
- 991 Choi, J., Ko, J., Racz, B., Burette, A., Lee, J.R., Kim, S., Na, M., Lee, H.W., Kim, K., Weinberg, R.J., and  
992 Kim, E. (2005). Regulation of dendritic spine morphogenesis by insulin receptor substrate 53, a  
993 downstream effector of Rac1 and Cdc42 small GTPases. *J Neurosci* 25, 869-879.
- 994 Chung, C., Ha, S., Kang, H., Lee, J., Um, S.M., Yan, H., Yoo, Y.E., Yoo, T., Jung, H., Lee, D., et al. (2019).  
995 Early Correction of N-Methyl-D-Aspartate Receptor Function Improves Autistic-like Social  
996 Behaviors in Adult Shank2(-/-) Mice. *Biol Psychiatry* 85, 534-543. 10.1016/j.biopsych.2018.09.025.
- 997 Chung, W., Choi, S.Y., Lee, E., Park, H., Kang, J., Park, H., Choi, Y., Lee, D., Park, S.G., Kim, R., et al.  
998 (2015). Social deficits in IRSp53 mutant mice improved by NMDAR and mGluR5 suppression. *Nat*  
999 *Neurosci*. 10.1038/nn.3927.
- 1000 Clement, J.P., Aceti, M., Creson, T.K., Ozkan, E.D., Shi, Y., Reish, N.J., Almonte, A.G., Miller, B.H., Wiltgen,  
1001 B.J., Miller, C.A., et al. (2012). Pathogenic SYNGAP1 mutations impair cognitive development by  
1002 disrupting maturation of dendritic spine synapses. *Cell* 151, 709-723. 10.1016/j.cell.2012.08.045.
- 1003 Fromer, M., Pocklington, A.J., Kavanagh, D.H., Williams, H.J., Dwyer, S., Gormley, P., Georgieva, L., Rees,  
1004 E., Palta, P., Ruderfer, D.M., et al. (2014). De novo mutations in schizophrenia implicate synaptic  
1005 networks. *Nature* 506, 179-184. 10.1038/nature12929.



- 1006 Homayoun, H., and Moghaddam, B. (2006). Bursting of prefrontal cortex neurons in awake rats is  
1007 regulated by metabotropic glutamate 5 (mGlu5) receptors: rate-dependent influence and  
1008 interaction with NMDA receptors. *Cereb Cortex* *16*, 93-105. 10.1093/cercor/bhi087.
- 1009 Kang, J., Park, H., and Kim, E. (2016). IRSp53/BAIAP2 in dendritic spine development, NMDA receptor  
1010 regulation, and psychiatric disorders. *Neuropharmacology* *100*, 27-39.  
1011 10.1016/j.neuropharm.2015.06.019.
- 1012 Kim, M.H., Choi, J., Yang, J., Chung, W., Kim, J.H., Paik, S.K., Kim, K., Han, S., Won, H., Bae, Y.S., et al.  
1013 (2009). Enhanced NMDA receptor-mediated synaptic transmission, enhanced long-term  
1014 potentiation, and impaired learning and memory in mice lacking IRSp53. *J Neurosci* *29*, 1586-  
1015 1595. 10.1523/JNEUROSCI.4306-08.2009.
- 1016 Kim, Y., Noh, Y.W., Kim, K., Yang, E., Kim, H., and Kim, E. (2020). IRSp53 Deletion in Glutamatergic  
1017 and GABAergic Neurons and in Male and Female Mice Leads to Distinct Electrophysiological and  
1018 Behavioral Phenotypes. *Front Cell Neurosci* *14*, 23. 10.3389/fncel.2020.00023.
- 1019 Lazaro, M.T., Taxidis, J., Shuman, T., Bachmutsky, I., Ikrar, T., Santos, R., Marcello, G.M., Mylavarapu, A.,  
1020 Chandra, S., Foreman, A., et al. (2019). Reduced Prefrontal Synaptic Connectivity and Disturbed  
1021 Oscillatory Population Dynamics in the CNTNAP2 Model of Autism. *Cell Rep* *27*, 2567-2578  
1022 e2566. 10.1016/j.celrep.2019.05.006.
- 1023 Lee, D.K., Li, S.W., Bounni, F., Friedman, G., Jamali, M., Strahs, L., Zeligler, O., Gabrieli, P., Stankovich,  
1024 M.A., Demaree, J., and Williams, Z.M. (2021a). Reduced sociability and social agency encoding in  
1025 adult Shank3-mutant mice are restored through gene re-expression in real time. *Nat Neurosci*

- 1026        24, 1243-1255. 10.1038/s41593-021-00888-4.
- 1027    Lee, E., Lee, J., and Kim, E. (2017). Excitation/Inhibition Imbalance in Animal Models of Autism  
1028        Spectrum Disorders. *Biol Psychiatry* 81, 838-847. 10.1016/j.biopsych.2016.05.011.
- 1029    Lee, E., Lee, S., Shin, J.J., Choi, W., Chung, C., Lee, S., Kim, J., Ha, S., Kim, R., Yoo, T., et al. (2021b).  
1030        Excitatory synapses and gap junctions cooperate to improve P<sub>v</sub> neuronal burst firing and cortical  
1031        social cognition in Shank2-mutant mice. *Nat Commun* 12, 5116. 10.1038/s41467-021-25356-2.
- 1032    Lee, E., Rhim, I., Lee, J.W., Ghim, J.W., Lee, S., Kim, E., and Jung, M.W. (2016). Enhanced Neuronal  
1033        Activity in the Medial Prefrontal Cortex during Social Approach Behavior. *J Neurosci* 36, 6926-  
1034        6936. 10.1523/JNEUROSCI.0307-16.2016.
- 1035    Lee, E.J., Choi, S.Y., and Kim, E. (2015). NMDA receptor dysfunction in autism spectrum disorders.  
1036        *Curr Opin Pharmacol* 20, 8-13. 10.1016/j.coph.2014.10.007.
- 1037    Levy, D.R., Tamir, T., Kaufman, M., Parabucki, A., Weissbrod, A., Schneidman, E., and Yizhar, O. (2019).  
1038        Dynamics of social representation in the mouse prefrontal cortex. *Nat Neurosci* 22, 2013-2022.  
1039        10.1038/s41593-019-0531-z.
- 1040    Mathis, A., Mamidanna, P., Cury, K.M., Abe, T., Murthy, V.N., Mathis, M.W., and Bethge, M. (2018).  
1041        DeepLabCut: markerless pose estimation of user-defined body parts with deep learning. *Nat*  
1042        *Neurosci* 21, 1281-1289. 10.1038/s41593-018-0209-y.
- 1043    Mielnik, C.A., Binko, M.A., Chen, Y., Funk, A.J., Johansson, E.M., Intson, K., Sivananthan, N., Islam, R.,  
1044        Milenkovic, M., Horsfall, W., et al. (2021). Consequences of NMDA receptor deficiency can be  
1045        rescued in the adult brain. *Mol Psychiatry* 26, 2929-2942. 10.1038/s41380-020-00859-4.

- 1046 Miura, I., Sato, M., Overton, E.T.N., Kunori, N., Nakai, J., Kawamata, T., Nakai, N., and Takumi, T. (2020).  
1047 Encoding of social exploration by neural ensembles in the insular cortex. *PLoS Biol* *18*, e3000584.  
1048 10.1371/journal.pbio.3000584.
- 1049 Nelson, S.B., and Valakh, V. (2015). Excitatory/Inhibitory Balance and Circuit Homeostasis in Autism  
1050 Spectrum Disorders. *Neuron* *87*, 684-698. 10.1016/j.neuron.2015.07.033.
- 1051 Ribases, M., Bosch, R., Hervas, A., Ramos-Quiroga, J.A., Sanchez-Mora, C., Bielsa, A., Gastaminza, X.,  
1052 Guijarro-Domingo, S., Nogueira, M., Gomez-Barros, N., et al. (2009). Case-control study of six  
1053 genes asymmetrically expressed in the two cerebral hemispheres: association of BAIAP2 with  
1054 attention-deficit/hyperactivity disorder. *Biol Psychiatry* *66*, 926-934.  
1055 10.1016/j.biopsych.2009.06.024.
- 1056 Sawallisch, C., Berhorster, K., Disanza, A., Mantoani, S., Kintscher, M., Stoenica, L., Dityatev, A., Sieber,  
1057 S., Kindler, S., Morellini, F., et al. (2009). The insulin receptor substrate of 53 kDa (IRSp53) limits  
1058 hippocampal synaptic plasticity. *J Biol Chem* *284*, 9225-9236. M808425200 [pii]  
1059 10.1074/jbc.M808425200.
- 1060 Schmeisser, M.J., Ey, E., Wegener, S., Bockmann, J., Stempel, V., Kuebler, A., Janssen, A.L., Bourgeron,  
1061 T., Gundelfinger, E.D., and Boeckers, T.M. (2012). Autistic-like behaviours and hyperactivity in mice  
1062 lacking ProSAP1/Shank2. *Nature*.
- 1063 Scita, G., Confalonieri, S., Lappalainen, P., and Suetsugu, S. (2008). IRSp53: crossing the road of  
1064 membrane and actin dynamics in the formation of membrane protrusions. *Trends Cell Biol* *18*,

- 1065 52-60. 10.1016/j.tcb.2007.12.002.
- 1066 Selimbeyoglu, A., Kim, C.K., Inoue, M., Lee, S.Y., Hong, A.S.O., Kauvar, I., Ramakrishnan, C., Fenno, L.E.,  
1067 Davidson, T.J., Wright, M., and Deisseroth, K. (2017). Modulation of prefrontal cortex  
1068 excitation/inhibition balance rescues social behavior in CNTNAP2-deficient mice. *Sci Transl Med*  
1069 *9*. 10.1126/scitranslmed.aah6733.
- 1070 Sendhilnathan, N., Basu, D., and Murthy, A. (2020). Assessing within-trial and across-trial neural  
1071 variability in macaque frontal eye fields and their relation to behaviour. *Eur J Neurosci* *52*, 4267-  
1072 4282. 10.1111/ejn.14864.
- 1073 Shin, W., Kim, K., Serraz, B., Cho, Y.S., Kim, D., Kang, M., Lee, E.J., Lee, H., Bae, Y.C., Paoletti, P., and  
1074 Kim, E. (2020). Early correction of synaptic long-term depression improves abnormal anxiety-like  
1075 behavior in adult GluN2B-C456Y-mutant mice. *PLoS Biol* *18*, e3000717.  
1076 10.1371/journal.pbio.3000717.
- 1077 Sohal, V.S., and Rubenstein, J.L.R. (2019). Excitation-inhibition balance as a framework for  
1078 investigating mechanisms in neuropsychiatric disorders. *Mol Psychiatry* *24*, 1248-1257.  
1079 10.1038/s41380-019-0426-0.
- 1080 Soltau, M., Berhorster, K., Kindler, S., Buck, F., Richter, D., and Kreienkamp, H.J. (2004). Insulin receptor  
1081 substrate of 53 kDa links postsynaptic shank to PSD-95. *J Neurochem* *90*, 659-665.  
1082 10.1111/j.1471-4159.2004.02523.x
- 1083 JNC2523 [pii].

- 1084 Toma, C., Hervás, A., Balmana, N., Vilella, E., Aguilera, F., Cusco, I., del Campo, M., Caballero, R., De  
1085 Diego-Otero, Y., Ribases, M., et al. (2011). Association study of six candidate genes asymmetrically  
1086 expressed in the two cerebral hemispheres suggests the involvement of BAIAP2 in autism. *J*  
1087 *Psychiatr Res* *45*, 280-282. 10.1016/j.jpsychires.2010.09.001.
- 1088 Won, H., Lee, H.R., Gee, H.Y., Mah, W., Kim, J.I., Lee, J., Ha, S., Chung, C., Jung, E.S., Cho, Y.S., et al.  
1089 (2012). Autistic-like social behaviour in Shank2-mutant mice improved by restoring NMDA  
1090 receptor function. *Nature* *486*, 261-265. 10.1038/nature11208.
- 1091 XiangWei, W., Jiang, Y., and Yuan, H. (2018). De Novo Mutations and Rare Variants Occurring in  
1092 NMDA Receptors. *Curr Opin Physiol* *2*, 27-35. 10.1016/j.cophys.2017.12.013.
- 1093 Yan, Z., and Rein, B. (2021). Mechanisms of synaptic transmission dysregulation in the prefrontal  
1094 cortex: pathophysiological implications. *Mol Psychiatry*. 10.1038/s41380-021-01092-3.
- 1095 Yizhar, O., Fenno, L.E., Prigge, M., Schneider, F., Davidson, T.J., O'Shea, D.J., Sohal, V.S., Goshen, I.,  
1096 Finkelstein, J., Paz, J.T., et al. (2011). Neocortical excitation/inhibition balance in information  
1097 processing and social dysfunction. *Nature* *477*, 171-178. 10.1038/nature10360.
- 1098 Yizhar, O., and Levy, D.R. (2021). The social dilemma: prefrontal control of mammalian sociability.  
1099 *Curr Opin Neurobiol* *68*, 67-75. 10.1016/j.conb.2021.01.007.
